# Supplementary material for: Development and validation of a novel prognostic model for patients with surgically resected esophageal squamous cell carcinoma
Source: Front Oncol. 2022 Aug 18;12:955353. doi: 10.3389/fonc.2022.955353 (PMC9435602; doi:10.3389/fonc.2022.955353)
Supplement: Supplementary file 1 [file DataSheet_1.xlsx]

## Sheet: raw data
patients	survival time	survival status	gender	age	smoke	drink	hypertension	diabetes	T stage	N stage	AJCC stage	grade	ALB	HGB	PLT	Cr	ALP	AST	AGR	SI	γ-GT	ALT	Cholesterol	TG	Cys	RDW	GLB	TyG	NLR	dNLR	LMR	PLR	LODDS	SIS	NPS	PNI	AFR
1	4.03562	0	1	54	1	1	0	0	4	1	3	3	45.2	154	200	69	58	24	1.3	19.6	18	17	180.929	209.096	0.91	47.8	35	8.97748	1.36032	0.976744	4.84314	80.9717	-0.792392	0	0	57.55	11.4141
2	4.53973	0	1	79	1	1	0	1	3	0	2	1	40.9	148	126	80	58	23	1.4	17.5	23	28	149.614	138.216	1.06	48	28.3	9.30984	1.34951	1.02206	3.81481	61.165	-0.477121	1	2	51.2	12.8213
3	4.0137	0	1	51	1	1	0	0	3	1	3	2	31.6	106	389	68	85	20	1	6.4	34	14	194.46	104.548	1.05	43.5	30.4	8.29614	2.20556	1.66807	3.71134	108.056	-0.913814	2	2	49.6	5.4766
4	6.12329	0	2	73	0	0	0	0	1	0	1	1	41.3	125	146	62	69	29	1.6	16.4	13	12	207.604	69.994	0.96	46.6	26.6	8.13388	0.859091	0.672598	6.28571	66.3636	-0.69897	0	0	52.3	14.4406
5	3.43288	1	2	56	1	1	0	0	2	0	2	1	43.6	122	147	55	36	23	2.1	13.4	15	6	231.96	43.414	0.79	43.4	20.7	7.58541	0.909677	0.746032	5.16667	94.8387	-1.32222	0	0	51.35	16.7692
6	4.13425	0	1	66	1	1	0	0	3	2	3	2	37.7	107	222	54	56	22	1.2	10.5	20	12	132.604	77.968	0.79	32.8	32.3	7.85644	2.64789	1.84314	2.95833	156.338	-0.433656	2	3	44.8	7.72541
7	1.36438	1	1	69	0	0	0	0	3	1	3	1	41.8	148	186	71	71	21	1.3	10.5	16	17	180.156	98.346	0.83	45.2	31.1	8.43052	2.54615	1.66332	2.45283	143.077	-1.43136	1	1	48.3	10.024
8	2.07397	1	1	56	1	1	0	0	3	2	3	2	45	135	186	91	58	19	1.6	14.3	47	13	180.929	132.014	0.85	39.3	27.6	8.71524	2.22368	1.67327	3.61905	122.368	0	1	1	52.6	15.7343
9	7.74795	0	1	67	1	0	0	0	2	0	2	2	43.5	154	168	88	73	22	1.4	20.6	43	15	187.501	102.776	0.77	41.8	30.1	8.55076	6.81102	4.4359	2.54	132.283	-0.954243	1	2	49.85	9.73154
10	3.73699	1	1	54	1	0	0	0	3	1	3	1	39	132	159	84	51	18	1.4	17.4	14	12	152.707	40.756	1.01	47.1	27.3	7.21855	2.52593	1.80423	4.21875	117.778	-1.01424	2	3	45.75	13.0872
11	2.33425	1	1	63	0	0	0	0	4	0	4	2	43.1	125	127	66	82	23	1.3	7.4	16	17	150.387	93.916	1.07	45.1	33.1	8.50607	3.74699	2.08725	2.18421	76.506	-0.954243	1	3	51.4	8.50099
12	8.69041	0	2	67	0	0	0	0	2	0	2	2	42.8	105	276	13	38	18	1.7	28.6	11	10	217.269	694.624	0.86	36.4	25.6	10.6865	2.20312	1.86344	6.4	143.75	-1.61278	0	0	52.4	10.7
13	2.94795	0	1	54	0	0	0	0	3	1	3	1	32.5	110	129	70	57	30	0.8	3	8	24	117.14	240.106	0.67	44.9	40.1	9.53147	10.4556	6.31544	1.8	143.333	-1.01424	2	4	37	11.6487
14	0.956164	1	1	66	1	1	0	1	3	2	3	2	42.7	130	226	70	73	16	1.3	13.8	122	35	187.501	123.154	0.95	44.2	31.8	8.65739	3.41532	2.46939	2.75556	91.129	-0.116506	1	2	55.1	4.88558
15	8.13973	0	2	51	0	0	0	0	2	0	2	2	47.1	107	238	53	81	15	1.5	7.6	14	12	180.929	94.802	0.8	38.4	31.8	8.40534	5.90698	4.16393	2.86667	276.744	-1.27875	1	2	51.4	11.0304
16	7.51233	0	2	67	0	0	0	0	3	0	2	2	48.4	111	238	56	110	15	1.8	9.4	52	19	215.336	93.03	0.83	49.1	27.5	8.53679	3.1028	1.86517	3.56667	222.43	-1.27875	1	2	53.75	12.7368
17	6.51507	0	2	60	0	0	0	1	1	0	1	3	39.3	130	161	63	140	34	1.1	9	24	54	174.357	164.796	1.33	41.4	35.2	8.9809	2.21809	1.64822	4.17778	85.6383	-1.32222	2	3	48.7	10.4521
18	3.4137	0	1	55	1	1	0	0	3	2	3	2	42.2	161	171	94	36	4	1.5	13.4	26	14	222.682	86.828	0.86	41.4	27.6	8.26054	1.40234	1.19269	8	66.7969	-0.673416	0	0	55	19.009
19	6.63014	0	1	52	1	1	0	0	2	0	2	2	40.5	148	154	61	50	25	1.6	20.2	29	30	185.955	68.222	0.78	47.7	24.8	7.91961	1.80612	1.19595	3.0625	78.5714	-1.11394	1	1	50.3	10.5195
20	3.4274	1	1	64	0	0	0	0	3	0	1	2	40.4	122	100	71	66	24	1.5	17.8	15	11	155.8	61.134	0.93	45.5	27.2	7.70406	1.84404	1.34899	4.73913	91.7431	-1.27875	0	1	45.85	12.0597
21	3.03014	1	1	52	1	1	0	0	4	0	3	1	31.3	137	304	55	100	32	1	16.4	85	72	124.099	67.336	0.94	41.5	30.2	7.88397	7.5124	4.11312	1.5125	251.24	-1.27875	2	4	37.35	10.8681
22	8.10685	0	1	62	0	1	0	0	3	1	3	3	41.4	149	166	83	97	97	1	47.6	59	209	147.681	80.626	0.96	50.7	43.1	8.37881	3.11628	2.1383	2.58	128.682	-0.662758	1	3	47.85	13.7086
23	8.12603	0	1	55	1	1	0	0	3	0	2	1	44.2	155	301	83	80	30	1.5	10.9	16	14	238.146	435.912	0.71	49.1	28.6	10.0597	1.55814	1.06349	4.3	140	-0.954243	1	1	54.95	12.1429
24	8.65205	0	1	61	0	0	0	0	3	0	2	2	39.6	131	114	93	50	3	1.7	18.2	15	18	109.021	46.072	0.89	45.7	23.5	7.50903	4.16529	2.57143	2.42	94.2149	-1.61278	2	4	45.65	12.899
25	6.27671	0	1	66	1	1	0	0	3	0	2	2	41	139	162	76	82	21	1.4	25.8	18	19	185.955	92.144	0.97	46.1	29.8	8.35568	2.39568	1.88136	4.34375	116.547	-1.23045	1	1	47.95	14.8551
26	6.14521	0	1	46	1	1	0	0	3	0	2	2	42.9	131	151	75	99	17	1.7	30.9	64	19	146.908	292.38	1.45	56	25.7	9.00021	1.14176	0.925466	6.21429	57.8544	-1.23045	0	1	55.95	16.8898
27	3.1589	0	1	63	1	1	0	0	3	1	3	2	44.3	152	170	80	53	52	1.3	20.7	44	78	218.429	85.942	0.85	47.1	33.4	7.98326	2.79545	2.03867	3.14286	128.788	-0.662758	1	1	50.9	17.3047
28	2.36712	1	1	60	1	1	0	0	3	1	3	2	40.7	156	247	73	53	20	1.6	14.9	27	17	207.218	129.356	1.02	49.1	25	8.45604	2.72321	1.5641	2.11321	220.536	-0.477121	1	1	46.3	9.62175
29	5.73699	0	1	68	1	1	0	0	1	2	3	3	38.3	139	191	70	71	15	1.4	10.1	25	12	153.867	126.698	0.84	41.1	27.1	8.76891	2.74725	1.38889	1.26389	209.89	-0.221849	2	3	42.85	7.91322
30	0.986301	1	1	69	1	1	0	0	2	0	2	1	32.9	110	263	104	43	12	1.1	12.4	15	8	131.444	82.398	0.96	43.5	30.5	8.20817	2.45181	1.43816	2.76667	158.434	-1.51851	2	3	41.2	7.54587
31	1.97534	1	1	62	1	1	1	0	3	2	3	2	45.8	145	177	74	58	18	1.4	18.4	17	15	176.676	194.034	0.91	41.1	32.9	9.20923	2.4586	1.72321	3.20408	112.739	-0.531479	1	2	53.65	17.4809
32	4.95616	0	1	67	1	1	0	0	3	1	3	2	42.6	107	272	66	58	16	1.6	2.3	27	15	155.8	147.076	1.03	54.3	26.5	8.76095	2.29524	1.21106	2.69231	259.048	-1.09108	1	2	47.85	14.2475
33	2.8137	0	1	59	0	0	0	0	2	1	3	3	32.8	118	260	68	62	17	1.1	8.1	45	8	146.521	93.03	1.01	47.4	31.1	8.09368	1.86283	1.27964	2.43011	115.044	-0.367977	2	3	44.1	8.2
34	3.2137	1	1	61	1	1	0	0	3	1	3	2	45.5	133	123	83	55	20	1.6	14.6	17	38	194.46	108.092	0.77	42.8	28.6	8.52887	1.57207	1.15947	4.44	55.4054	-0.920819	0	0	56.6	12.7809
35	5.27945	0	1	57	1	1	0	0	3	2	3	2	40.5	142	180	79	54	16	1.6	18.3	10	11	132.217	58.476	0.84	38.5	25	7.84893	3.32283	2.13131	2.44231	141.732	-0.324511	1	3	46.85	11.5057
36	1.4137	1	1	63	0	0	0	0	2	0	2	2	45.2	120	97	80	35	17	1.4	24.6	29	7	207.218	130.242	1.06	54.6	31.3	8.69586	4.26374	2.73239	2.02222	106.593	-0.69897	1	2	49.75	12.8409
37	4.91781	0	2	54	0	1	0	0	2	1	2	2	44.1	131	186	81	77	23	1.3	15.8	23	19	210.697	132.014	1.14	44.6	33.4	8.72107	1.73684	1.29607	3.98387	75.3036	-0.920819	1	1	56.45	11.9837
38	2.52055	0	1	49	1	1	0	0	3	1	4	2	44.8	99	135	74	66	19	1.8	6.5	20	15	152.32	118.724	0.91	36	24.7	8.46693	2.46809	1.72277	3.06522	95.7447	-0.564271	1	2	51.85	15.7193
39	6.16712	0	1	62	0	1	0	0	3	0	2	2	41.4	115	179	83	80	20	1.3	13.9	31	15	143.429	79.74	1.1	33.4	32.3	8.11929	2.8	2.06818	3.51351	137.692	-1.04139	1	2	47.9	16.1089
40	8.06849	0	1	62	0	0	0	1	3	0	2	1	38.2	133	96	84	86	18	1.1	29.5	12	14	174.357	81.512	0.99	43	33.3	8.8701	3.75926	2.47561	3.6	88.8889	-1.23045	2	4	43.6	13.4035
41	2.02466	1	1	51	1	1	0	0	2	1	3	2	42.8	133	268	66	90	19	1.4	13.3	41	23	206.831	120.496	1.04	52	29.7	8.68078	2.42553	1.78125	3.91667	114.043	-0.845098	1	1	54.55	9.49002
42	5.8411	0	1	79	1	1	0	0	2	0	2	3	39.6	131	143	92	37	27	1.3	20.6	12	26	189.821	80.626	1.17	44.9	29.5	8.39861	2.35802	1.92929	4.90909	88.2716	-1.01424	1	1	47.7	14.4526
43	6.60274	0	2	70	0	0	0	0	1	0	1	1	37.8	105	261	50	104	23	1.1	7.3	11	19	174.743	93.03	0.65	44.6	34.6	8.2627	2.99005	2.15412	3.58929	129.851	-0.954243	2	4	47.85	9.35644
44	5.97534	1	2	65	0	0	0	0	2	0	1	1	44.1	130	147	66	89	20	1.1	11.9	14	15	215.336	77.082	0.69	48.8	40.5	8.14148	2.54286	1.7451	3.5	105	-1.36173	1	1	51.1	8.44828
45	2.70685	1	2	59	0	0	1	0	3	0	2	2	46.2	135	201	67	121	14	1.4	14.7	11	7	240.079	63.792	0.87	45.1	34	7.93389	4.34188	2.51485	2.54348	171.795	-0.69897	1	2	52.05	14.2593
46	8.73151	0	1	69	1	0	0	0	2	0	2	2	38.7	136	113	77	78	20	1.07	14.2	14	14	251.29	122.268	0.93	47.9	36.3	8.59268	3.01869	2.19728	2.675	105.607	-1.32222	2	3	44.05	7.34345
47	6.8	0	1	50	0	1	0	0	1	0	1	3	39.7	133	233	82	92	11	1.3	12.6	21	15	132.604	71.766	0.77	43.2	30.3	8.14211	1.72251	1.36515	5.61765	121.99	-1.39794	1	2	49.25	10.8767
48	7.81644	0	2	60	0	0	0	0	3	1	3	2	44.4	110	159	46	65	19	1.6	12.3	13	11	191.754	103.662	0.44	36.9	27	8.61838	3.95798	2.96226	3.96667	133.613	-0.531479	1	2	50.35	13.7037
49	6.79452	0	2	63	0	0	0	0	3	0	2	1	42.2	109	177	69	71	8	1.6	10.1	17	7	249.744	125.812	0.86	51.4	27.1	8.62329	1.33121	0.832669	4.90625	112.739	-1.11394	0	0	50.05	13.3123
50	8.65479	0	1	63	1	1	0	0	1	0	1	1	38.3	140	127	68	46	14	1.6	13.8	14	10	178.996	56.704	0.79	51.2	23.8	8.23113	1.84354	1.13389	2.45	86.3946	-1.04139	2	3	45.65	10.9117
51	5.91507	0	1	60	1	1	0	0	3	1	3	3	41.9	140	192	70	61	18	1.4	6.2	21	16	163.918	81.512	0.79	50.3	31	8.07958	2.71429	1.51046	1.35714	144.361	-0.845098	1	2	48.55	6.00287
52	5.81644	0	2	71	0	0	0	0	3	1	3	2	46.3	148	98	58	89	20	1.4	30.9	13	19	212.243	102.776	0.86	43.3	33.8	8.57375	1.06466	0.789137	6.27027	42.2414	-0.673416	0	0	57.9	11.6332
53	4.72329	0	1	71	1	0	0	0	2	0	1	3	41	113	153	75	104	17	1.4	11.3	14	12	213.403	217.956	0.82	48.8	28.9	9.55003	2.62712	1.9375	4.21429	129.661	-0.477121	1	1	46.9	10.1485
54	0.534247	1	1	64	1	1	0	0	3	1	3	2	36.1	109	186	66	64	15	1.3	11.7	53	10	234.666	127.584	1.06	63.4	27.7	8.65143	0.911197	0.728395	5.75556	71.8147	-0.623249	1	1	49.05	12.363
55	0.550685	1	1	66	1	1	1	1	3	2	3	1	48.3	144	271	92	92	13	1.9	10	18	9	184.022	62.906	0.64	43	25.7	8.23948	6.27273	4.81395	3.3	273.737	0.845098	1	2	53.25	10.1258
56	7.35616	0	2	48	0	0	0	0	1	0	1	2	37.6	118	251	75	55	13	1.4	8.8	13	8	141.882	91.258	0.92	42.1	27.8	8.12919	1.6	1.24771	5.48387	147.647	-1.27875	1	2	46.1	13.4767
57	2.74521	1	1	59	0	0	0	0	2	2	3	2	42	163	176	80	77	12	1.5	21	16	18	203.352	58.476	0.68	42.3	28.1	7.77435	1.62406	1.1134	3.8	132.331	-0.433656	1	1	48.65	14.841
58	2.44932	0	2	72	0	0	0	0	3	1	3	2	40.7	114	93	72	42	13	1.2	13.5	10	7	197.166	110.75	0.91	46.5	33	8.86459	2.33898	1.68293	3.57576	78.8136	-0.792392	1	1	46.6	12.1493
59	2.96986	1	1	50	1	1	0	0	2	2	3	2	36.1	130	132	84	80	14	1.3	13.1	19	12	144.975	106.32	0.88	48.1	27.2	8.30588	3.1413	2.04965	2.78788	143.478	-0.477121	2	4	40.7	11.759
60	3.28493	1	1	60	1	1	0	0	4	0	2	1	39.4	108	98	76	53	59	1.4	19.5	33	80	156.96	65.564	1.34	61.1	27.3	7.87764	2.31481	1.38889	2.20408	90.7407	-1.17609	2	3	44.8	13.6332
61	3.7589	1	1	48	1	1	0	1	1	0	1	2	41.4	141	165	54	120	12	1.7	19	14	10	136.47	143.532	0.71	48.2	24.9	10.4095	4.83784	3.10405	2.09434	148.649	-1.27875	1	3	46.95	11.4681
62	3.72603	1	1	57	1	1	0	0	2	0	2	2	35.9	108	232	52	112	45	1.3	8.9	307	48	187.114	70.88	0.82	47.3	27.7	7.97991	1.90476	1.3913	3.16981	138.095	-1.39794	2	2	44.3	9.18159
63	1.36164	1	1	71	1	0	0	0	3	2	3	2	36.4	126	114	82	70	28	1.7	9.7	30	20	212.63	40.756	0.78	50.3	21	7.81437	3.51389	2.36449	3.6	158.333	-0.268845	2	3	40	10.3704
64	1.01644	1	1	53	1	0	0	0	3	1	3	2	37.3	147	240	50	65	23	1.5	23.5	17	22	202.192	71.766	0.6	48.6	25.1	7.73758	2.20961	1.42938	2.69412	104.803	-1.06695	2	2	48.75	7.97009
65	8.31233	0	2	66	0	0	1	1	3	0	2	2	40.4	111	247	91	65	6	1.5	13.7	11	10	179.382	83.284	1.1	44	27.2	9.35385	4.23333	2.95349	3	274.444	-1.17609	1	3	44.9	12.3926
66	7.5589	0	1	75	1	1	0	1	2	0	2	2	41.2	150	213	68	95	23	1.3	6.7	29	21	124.485	52.274	1.19	44.2	31.3	8.1416	2.83333	1.34604	4.05	131.481	-1.61278	1	2	49.3	9.27928
67	4.43836	0	1	68	0	0	0	0	2	1	2	2	41.1	116	356	91	76	33	1.1	8.1	12	20	210.697	67.336	1.08	45.1	37.6	8.03026	2	1.2973	2.96296	148.333	-1.06695	1	1	53.1	9.47005
68	4.70685	0	1	61	1	1	0	0	3	0	1	1	41.9	143	135	86	76	19	1.5	6.3	19	21	192.913	107.206	1.01	42.3	28	8.36263	2.69531	1.68293	2.06452	105.469	-1.04139	1	1	48.3	12.5075
69	7.83288	0	1	63	1	1	0	0	1	0	1	2	41.8	140	218	85	48	23	1.5	21.5	17	20	204.898	38.098	0.4	41.9	27	7.57961	2.1215	1.58741	3.56667	101.869	-1.36173	1	1	52.5	14.4138
70	5.84932	1	1	58	1	1	0	0	2	0	2	2	38.7	127	163	80	74	14	1.4	16.3	19	10	208.377	126.698	0.89	47.5	27	8.44021	2.81452	1.65403	2.48	131.452	-1.49136	2	2	44.9	10.5163
71	3.32603	0	1	60	1	1	0	0	4	1	3	3	46	181	144	71	79	35	1.3	11.4	85	32	144.588	121.382	1.18	46.2	36.7	9.29374	2.64423	1.77419	3.46667	138.462	-0.414973	1	2	51.2	10.4784
72	6.91507	0	1	57	1	1	0	0	3	0	2	2	39.3	145	241	86	79	18	1.4	9.1	16	16	161.985	66.45	0.81	49.4	28.3	7.96852	1.69531	1.06897	2.24561	188.281	-1.36173	2	3	45.7	6.87063
73	4.74795	0	1	62	1	1	0	0	3	0	1	3	44.3	137	197	85	62	21	1.6	16.4	12	13	164.305	96.574	0.97	43.6	27.8	8.31297	2.88112	1.98077	2.64815	137.762	-1.36173	1	2	51.45	15.1712
74	4.8137	1	1	79	1	1	0	0	2	2	3	2	40.7	139	108	70	95	56	1.6	15.1	252	54	137.243	114.294	0.93	48.4	24.7	9.39815	18.2051	6.45455	0.565217	276.923	-0.827	1	3	42.65	11.0298
75	4.09863	0	2	60	0	0	0	0	3	0	2	2	42.6	104	88	68	62	21	1.7	18.8	12	23	107.475	80.626	0.98	50.2	24.9	7.46667	0.941909	0.774744	6.17949	36.5145	-1.11394	0	1	54.65	23.4066
76	8.50137	0	2	62	0	0	1	0	2	0	2	2	43.9	130	199	56	93	17	1.4	16.5	23	15	166.625	170.998	0.74	45.4	31.1	9.86461	1.78061	1.33716	6.53333	101.531	-1.04139	0	1	53.7	9.77728
77	3.76712	0	2	73	0	0	0	0	2	1	3	2	42.7	133	193	62	76	26	1.4	11.5	21	20	226.934	98.346	0.92	42.5	31.1	8.42665	1.03286	0.916667	10.1429	90.6103	-0.792392	0	0	53.35	13.47
78	7.6	0	1	61	1	1	0	0	3	0	2	2	46.1	162	211	67	76	21	1.8	26.8	23	20	197.166	115.18	0.83	40.5	25.8	8.7747	1.53977	1.08835	4.4	119.886	-1.04139	1	1	54.9	11.0287
79	1.92329	1	1	75	1	1	0	0	4	1	3	3	43	151	168	107	54	20	1.4	17.3	17	19	153.48	102.776	0.94	44.3	29.9	8.30225	3.65833	2.29843	2.7907	140	-0.255273	1	3	49	12.9909
80	7.66575	0	2	50	0	0	0	0	3	1	3	2	44	132	363	62	52	17	1.4	17.2	6	11	181.702	89.486	0.93	38.5	31.6	8.3609	2.38961	1.73585	3.85	235.714	-0.564271	1	1	51.7	10.628
81	4.11781	0	1	43	0	0	0	0	1	0	1	3	48.5	171	229	69	70	25	1.3	24.7	20	21	184.795	96.574	0.82	43.5	37.8	8.51325	6.30216	4.29412	2.4386	164.748	-0.845098	1	2	55.45	8.77034
82	1.01096	1	1	77	1	0	0	0	1	0	1	3	40.3	143	164	77	61	22	1.6	19.4	19	18	167.784	90.372	0.86	45	25.4	8.24017	3.01176	2.06452	3.26923	192.941	-0.845098	1	3	44.55	11.2256
83	3.90959	1	2	63	0	0	0	0	3	1	3	2	39.6	140	223	71	68	25	1.4	17	12	14	192.913	108.978	0.89	45.6	28.7	8.36084	2.33065	1.69006	4.96	179.839	-0.753328	1	1	45.8	12.1101
84	6.68219	0	1	53	1	1	0	0	2	0	2	2	41.2	113	280	77	74	20	0.9	11.7	61	14	175.516	102.776	1.06	45.1	43.6	8.45902	2.89714	1.67327	3.18182	160	-1.11394	1	2	49.95	9.62617
85	1.10959	1	1	52	0	1	0	0	3	0	2	1	40.5	131	128	70	57	18	1.6	11.8	17	22	130.284	45.186	0.73	38.4	25.1	8.25191	1.9932	1.48731	4.45455	87.0748	-1.17609	0	1	47.85	13.6364
86	4.38082	0	1	68	0	0	0	0	2	0	1	2	40.2	130	148	93	66	13	1.6	16.4	17	10	165.465	44.3	1.06	50.4	24.9	7.25516	3.14667	1.90323	1.92308	197.333	-0.69897	1	3	43.95	12.6814
87	8.58082	0	1	57	1	0	0	0	1	1	2	2	40	122	59	72	94	25	1.5	14.1	13	18	172.81	68.222	0.83	50.4	26.8	7.9016	4.50685	1.92398	1.46	80.8219	-1.09108	1	3	43.65	9.7561
88	4.82466	0	1	60	1	1	0	0	3	0	1	1	46.3	155	167	73	65	40	1.6	14.1	37	14	204.125	82.398	0.85	46.2	29.4	7.95945	3.96875	2.95349	2.97674	130.469	-1.32222	1	2	52.7	11.1298
89	4.73151	0	2	66	0	0	0	0	1	0	1	3	46.6	130	173	51	69	24	1.6	11.2	14	15	244.718	93.916	0.76	45.3	28.8	8.32477	1.84706	1.4537	5.66667	101.765	-1.11394	0	0	55.1	11.8878
90	7.8274	0	2	65	0	0	0	0	2	0	2	2	44.2	131	201	57	59	30	1.7	14	10	27	141.109	103.662	0.5	45.5	26.7	8.49659	1.06015	0.83432	5.32	75.5639	-1.27875	0	1	57.5	13.1157
91	3.73425	1	2	67	0	0	0	0	3	0	2	3	40.4	123	180	52	79	25	1.2	6.7	9	16	183.635	143.532	0.82	46.8	34.3	9.35208	2.30688	1.71654	3.78	95.2381	-1.32222	1	1	49.85	10.0748
92	1.80274	1	1	68	1	1	0	0	3	2	3	1	46.3	169	148	142	85	23	1.5	38	24	14	231.96	96.574	1.35	51.8	30.3	8.24914	3.04651	2.22034	3.225	114.729	-0.552842	1	2	52.75	13.9039
93	2.45205	1	1	66	1	1	0	0	3	2	2	1	36.7	132	233	86	89	23	1.4	13.3	20	17	180.542	76.196	1.2	41.1	26.8	7.78044	1.29124	1.06823	7.60784	60.0515	-1.72428	1	1	56.1	12.7431
94	4.07397	0	2	63	1	1	0	0	2	0	1	3	47.2	138	131	49	83	52	1.2	15	14	57	213.79	131.128	0.8	49.5	38.1	8.67076	1.77536	1.4	4.75862	94.9275	-1.4624	0	0	54.1	15.3746
95	1.92055	1	1	50	1	1	0	0	2	1	3	2	44.6	141	177	78	62	36	1.3	21.3	11	41	178.996	74.424	0.68	44.4	35.6	7.95627	1.38645	0.988636	3.43836	70.5179	-1.23045	1	2	57.15	14.8173
96	7.95342	0	1	55	0	1	0	0	3	0	2	2	41.1	135	176	108	52	17	1.4	22.3	33	12	177.063	74.424	1.08	43.4	30.4	8.21175	1.76364	1.21757	4.125	106.667	-1.36173	1	2	49.35	12.0528
97	2.06027	1	1	50	1	1	0	0	3	2	3	1	34.9	149	294	68	64	24	1.2	15.3	43	19	161.599	51.388	0.74	45.4	30	7.73803	2.92308	1.80952	2.13115	226.154	-0.613959	2	3	41.4	9.01809
98	1.76164	1	1	53	1	1	0	0	1	3	4	2	40	140	225	93	77	24	1.7	9.7	41	9	147.681	60.248	1.07	41.4	22.9	7.76587	2.10924	1.57862	5.28889	94.5378	-0.109144	0	1	51.9	10.2041
99	3.41096	1	1	65	1	1	1	0	2	0	1	1	37.8	139	173	117	75	17	1.7	16	30	18	213.017	161.252	1.38	53.5	22.1	8.74113	2.86842	1.6943	2.15094	151.754	-1.17609	2	2	43.5	9.26471
100	1.36438	1	1	67	1	1	0	0	3	1	3	2	35	123	126	55	70	30	0.9	3.7	12	20	105.928	63.792	0.67	45.5	38.5	7.80914	6.16216	3.67742	1.94737	170.27	-0.385351	2	4	38.7	7.70925
101	7.72329	0	1	57	1	1	0	0	3	1	3	2	38.9	143	199	66	69	19	1.7	12.6	14	14	141.496	57.59	0.48	40	23.3	7.60641	1.88281	1.34637	4.26667	155.469	-0.845098	2	3	45.3	11.4749
102	4.46301	0	1	50	1	1	0	0	2	0	1	1	43.3	134	309	68	58	21	1.6	8.3	20	12	161.599	142.646	1.04	42.5	26.6	8.62316	3.26404	2.15985	3.23636	173.596	-1.39794	1	3	52.2	12.3714
103	5.83562	0	1	48	1	1	0	0	2	0	2	3	41.4	143	145	87	90	26	1.7	21.1	65	33	185.568	105.434	0.95	43.9	24.9	8.26873	1.9204	1.35915	3.72222	72.1393	-1.61278	1	1	51.45	12.4324
104	4.14795	0	1	62	1	1	0	0	3	0	2	2	41	159	337	75	66	16	1.3	10.1	21	17	185.181	115.18	0.93	45.3	32.6	8.7618	1.41667	1.01493	3.42857	175.521	-1.39794	1	1	50.6	7.89981
105	6.25753	0	1	61	1	0	0	0	3	0	2	3	45.2	159	245	81	98	34	1.3	21.8	72	45	215.336	151.506	1.1	44.8	33.9	9.05363	1.88384	1.10682	4.125	123.737	-1.63347	1	1	55.1	15.322
106	4.84384	0	1	60	1	1	0	0	3	1	3	3	40.2	132	197	87	46	14	1.4	9.6	14	13	178.223	58.476	1	48.2	29.4	7.67194	2.76336	1.82828	2.84783	150.382	-0.884607	1	2	46.75	8.57143
107	3.50959	1	1	58	1	1	0	0	3	1	3	2	46.1	159	167	79	74	20	1.5	17.3	13	9	195.233	86.828	1	48.3	30.9	8.18285	2.27083	1.78689	4.23529	115.972	-0.884607	1	1	53.3	11.525
108	8.18904	0	1	71	0	0	0	0	1	0	1	3	34	121	211	86	71	16	0.9	15.2	14	7	190.594	141.76	1.08	43.8	38.6	8.83776	1.88406	1.39286	6.9	101.932	-1.32222	1	1	44.35	8.83117
109	3.45479	1	2	66	0	0	0	0	3	2	3	3	39.8	137	236	50	73	26	1.6	9.2	14	26	175.516	121.382	0.68	47.6	25.6	9.49924	1.08696	0.866667	4.27143	78.9298	0.146128	2	3	54.75	10.3109
110	4.22192	1	1	48	1	1	0	0	3	1	3	2	42	132	117	67	71	62	2.2	20.4	33	75	153.867	51.388	0.96	42.8	19.2	7.72586	1.78049	1.20994	3.075	95.122	-1.17609	1	2	48.15	18.2609
111	1.10959	1	1	65	1	1	0	0	3	2	3	2	45.6	162	160	75	81	23	1.4	15	31	22	165.851	82.398	0.87	43.3	32.6	8.17948	2.01613	1.38889	3.35135	129.032	0.196295	1	2	51.8	12.16
112	6.22192	0	1	64	1	1	0	0	3	0	2	2	40.9	135	230	75	87	17	1.4	8.8	18	15	157.346	69.994	0.83	41.1	29.4	8.49976	4.48947	3.07942	2.92308	121.053	-0.477121	1	3	50.4	10.3023
113	4.68767	0	1	52	1	1	0	0	4	3	3	2	41.4	130	260	59	96	15	1.6	14.3	16	12	189.821	105.434	0.84	41.5	25.3	8.44658	2.2069	1.52381	3.53659	179.31	-0.260913	1	1	48.65	10.7254
114	1.23014	1	1	51	1	1	0	0	3	2	3	3	39.1	132	215	58	90	33	1	12.7	69	42	132.99	72.652	0.72	43.8	39.7	8.03047	1.69925	1.22826	3.74648	80.8271	-0.745967	2	3	52.4	8.04527
115	5.24384	0	2	68	0	0	0	0	3	0	2	1	41.2	127	170	72	105	20	1.6	14.5	22	16	179.382	181.63	1.2	44.7	26.3	9.24133	1.25381	0.939163	5.9697	86.2944	-0.845098	0	1	51.05	10.404
116	1.78356	1	1	61	0	0	0	0	3	1	3	2	39.9	133	224	73	76	15	1.3	32.8	15	10	182.862	77.082	0.79	45.5	30.9	8.10862	3.41304	2.15068	3.28571	162.319	-1.17609	2	3	46.8	11.3352
117	5.29863	0	1	46	1	1	1	0	3	1	3	2	40	150	242	63	82	24	1.2	11.4	32	33	154.253	117.838	0.74	43.8	33.5	7.87479	4.05882	2.22581	1.91549	177.941	-0.845098	1	3	46.8	6.71141
118	0.654795	1	1	65	1	1	0	1	3	0	2	2	34.3	120	184	81	62	19	1.2	8.7	32	9	170.877	85.056	1.03	52.3	28.6	8.27369	4.80247	2.96947	1.84091	227.16	-1.39794	2	4	38.35	5.86325
119	4.26027	0	1	62	1	0	0	0	1	0	1	2	43.8	153	138	88	83	21	1.7	27.6	21	15	211.084	121.382	1.06	44.6	25.9	8.67886	1.78286	1.31092	3.30189	78.8571	-0.845098	1	1	52.55	11.7112
120	1.10959	1	2	75	0	0	1	0	1	2	3	3	43.1	117	304	60	102	22	1.4	26.2	49	19	202.192	135.558	1.06	63.6	31.7	8.47526	0.619718	0.54321	8.875	107.042	0.421005	0	0	57.3	15.1761
121	8.14247	0	1	59	0	1	0	0	3	0	2	3	43	137	216	82	90	17	1.4	14.7	21	9	167.011	166.568	0.63	44.2	31.8	8.96129	1.45909	1.15054	4.4	98.1818	-1.17609	1	2	54	11.5903
122	8.19726	0	1	61	1	1	0	0	1	0	1	2	43.6	140	235	75	29	22	1.42	19.3	22	14	264.048	62.02	0.7	49.2	30.7	7.82207	1.62057	1.29462	5.64	83.3333	-1.27875	0	0	57.7	9.12134
123	2.48767	0	1	65	1	1	0	0	3	1	3	3	35	112	339	85	87	34	0.6	9.7	75	11	158.893	74.424	1.14	45.1	58.3	7.95862	2.97222	1.92793	2.44068	235.417	-0.623249	2	4	42.2	6.34058
124	7.67397	0	1	59	0	0	0	1	1	0	1	2	42.8	131	68	81	79	34	1.8	19.3	59	67	165.465	192.262	0.91	46.5	24.3	9.4973	1.1875	1	8	42.5	-1.43136	0	1	50.8	13.9869
125	4.76438	0	1	57	1	1	0	0	3	2	3	2	43.3	132	169	73	86	63	1.6	11.1	40	60	126.032	123.154	0.83	46.5	26.7	8.5688	2.10056	1.67857	5.26471	94.4134	-0.134699	0	1	52.25	11.0742
126	1.55616	1	1	54	1	1	0	0	3	0	2	2	40.7	109	246	90	97	15	1.5	9.9	14	6	150.001	95.688	1.05	47.4	27.8	8.24897	3.64516	2.24503	2.02174	264.516	-0.954243	1	3	45.35	6.49123
127	1.14521	1	1	74	1	1	0	0	3	1	3	2	38.5	135	279	50	49	39	1.6	9	10	23	112.114	62.02	0.61	47.5	23.4	8.05811	4.84404	2.75	1.47297	255.963	-1.06695	2	4	43.95	11.3235
128	1.06849	1	1	66	1	1	0	0	3	2	3	1	41	117	190	68	59	16	1.4	7.6	25	18	164.692	116.066	0.92	41.4	29.4	8.42156	3.47059	2.39483	2.56164	101.604	-0.247784	1	3	50.35	7.46812
129	4.47397	1	1	64	1	0	0	0	3	1	3	1	42.5	156	139	71	83	18	1.4	22.6	23	20	232.347	217.956	0.79	46.3	30.5	9.0856	3.92994	2.76682	3.14	88.535	-0.884607	1	2	50.35	14.2617
130	6.01644	0	1	62	1	1	0	0	3	1	3	3	33.7	113	259	74	58	16	1.3	9.6	6	8	150.001	63.792	0.66	47.5	25.5	7.80447	4.45299	2.91061	2.65909	221.368	-0.819544	2	4	39.55	7.69406
131	7.67671	0	1	67	0	1	0	0	3	0	2	2	41	145	144	58	91	18	1.7	16.2	57	27	221.135	137.33	0.81	44.1	24	9.01573	3.89313	2.55	3.275	109.924	-1.17609	1	2	47.55	12.6543
132	0.879452	1	1	40	0	0	0	0	1	2	3	3	35	117	89	86	101	15	1	4.6	38	15	200.259	116.066	0.94	51	35.8	8.4904	5.98214	3.35	1.51351	79.4643	0	2	3	40.6	5.54675
133	4.24932	0	1	60	1	1	1	0	3	0	2	2	43.4	145	159	99	69	30	1.7	17	30	21	140.722	117.838	1.31	46.9	25	8.14211	2.31034	1.48889	2.23077	109.655	-1.70757	1	2	50.65	9.3133
134	3.72603	0	2	64	0	0	0	0	3	1	3	1	37.6	119	143	54	65	25	1.3	12.4	20	20	172.424	119.61	0.81	52.5	29.9	8.52689	1.1791	0.901141	4.67442	71.1443	0	1	2	47.65	13.2862
135	6.61096	0	2	66	0	0	0	0	2	1	2	2	42.9	118	163	41	126	16	1.4	8.3	21	17	221.135	185.174	0.68	45.9	30.8	9.12145	2.17881	1.72251	4.19444	107.947	-0.414973	1	1	50.45	12.3276
136	3.4	0	1	73	0	1	0	0	1	1	2	1	39.7	142	186	95	43	4	1.1	6.6	51	13	198.326	173.656	0.95	43.2	36.1	9.09125	2.82353	1.92	2.53731	109.412	-0.636822	2	2	48.2	6.80961
137	8.61644	0	1	49	1	1	0	0	3	0	2	2	41.3	140	128	74	81	20	1.5	16.7	16	20	126.032	58.476	0.7	43.1	27.2	8.03228	2.67376	1.85714	2.82	90.7801	-1.5682	1	2	48.35	13.6755
138	2.78356	1	2	74	0	0	0	1	2	0	2	2	39.7	115	192	67	143	30	1.3	11.3	20	22	133.764	128.47	1.11	41.1	31	9.02561	2.5431	1.90323	3.86667	165.517	-1.17609	2	3	45.5	8.78319
139	7.60274	0	1	71	0	0	0	0	2	0	2	2	45.2	168	74	76	79	78	1.4	21.5	36	138	150.774	64.678	1.13	44.6	31.3	8.05304	2.32704	1.7619	3.975	46.5409	-0.954243	1	2	53.15	14.3949
140	7.3863	1	1	65	1	1	0	0	3	0	2	1	39	105	189	64	59	19	1.4	14.1	10	21	208.377	82.398	0.95	44.4	28.4	8.0604	10.0253	4.21277	0.79	239.241	-1.75587	2	3	42.95	9.55882
141	4.06849	1	1	59	1	1	0	0	3	1	3	3	38	126	129	96	98	19	0.9	7.5	25	9	137.63	82.398	1.13	46.6	43	8.13484	3.68	1.4375	2.08333	103.2	-1.04139	2	4	44.25	7.01107
142	3.69589	1	1	64	1	1	0	0	2	0	2	2	35.6	129	117	75	75	24	1.5	17.9	19	19	158.506	61.134	0.86	43	23.7	7.96852	1.62222	1.1466	4.5	86.6667	-1.51851	1	2	42.35	10.7879
143	4.55068	0	1	50	1	1	0	1	2	1	2	2	39.9	147	194	64	75	16	1.6	14.5	15	16	125.258	45.186	0.76	41.6	25.4	7.05182	3.12598	2.1694	4.53571	152.756	-0.636822	1	3	46.25	14.562
144	2.7589	1	1	60	0	1	0	0	2	0	2	3	41.1	123	211	80	56	35	1.6	17.4	15	21	138.403	71.766	0.88	43	26.5	7.79505	2.01724	1.32955	3.13514	181.897	-1.11394	1	2	46.9	12.5305
145	2.36438	1	1	62	1	1	0	0	3	0	2	2	41.3	156	180	85	83	17	1.8	17.7	41	17	186.728	90.372	1.1	42.5	22.5	8.04402	2.36747	1.52918	2.76667	108.434	-1.70757	1	1	49.6	12.866
146	4.13151	0	1	54	1	1	0	0	1	0	1	1	45	152	168	84	79	35	1.5	29.7	40	57	240.465	373.006	0.95	43.2	29.9	9.7694	2.00763	1.48588	4.22581	128.244	-0.954243	1	1	51.55	14.0625
147	8.40274	0	2	66	0	0	0	0	1	0	1	1	39	121	197	73	70	13	1.3	16.6	11	12	150.001	113.408	1.13	46.6	29.2	8.63296	1.37342	0.716172	3.95	124.684	-1.11394	2	3	46.9	12.381
148	6.73973	0	1	68	0	0	1	0	2	0	2	1	36.1	123	237	106	38	51	1.2	26.5	10	11	152.707	76.196	1.05	47.2	29.4	8.05441	2.54286	1.50847	1.96629	135.429	-1.54407	2	3	44.85	11.5705
149	5.59452	1	1	70	1	1	0	0	2	0	2	2	42.3	109	129	81	57	18	1.32	4.5	20	14	213.403	80.626	0.9	44	32.1	8.51275	5.48718	2.58871	1.4625	110.256	-0.954243	1	2	48.15	8.21359
150	5.06849	0	1	73	1	0	1	0	1	0	1	1	38.2	143	220	81	78	20	1.5	6.7	20	14	157.346	110.75	1.1	46.6	25.3	8.50993	1.92169	1.44344	4.25641	132.53	-0.845098	2	3	46.5	10.6704
151	6.39452	0	2	66	0	0	1	1	3	0	2	1	46.3	134	140	62	134	17	1.5	12.2	41	16	236.213	227.702	0.94	43.9	31	9.41368	2.82443	1.7619	3.275	106.87	-0.845098	1	1	52.85	13.7798
152	2.58356	0	1	54	1	1	1	0	3	1	3	3	43.3	121	221	75	74	24	1.5	13.7	97	14	229.254	93.916	1.05	42.1	28.5	8.17709	1.75773	1.3166	3.66038	113.918	-1.11394	1	1	53	11.276
153	2.74247	1	2	74	0	1	0	0	3	0	2	2	43.9	123	141	64	74	13	1.4	12.2	35	24	211.084	152.392	0.97	44.1	30.6	9.03033	1.96429	1.27907	2.25806	100.714	-1.32222	1	1	50.9	12.0604
154	8.41918	0	1	74	0	0	0	0	1	0	1	2	37.1	132	131	60	66	18	1	28.3	18	14	153.094	46.958	1.04	43.9	36.1	8.42602	0.923077	0.458333	7.15	91.6084	-1.11394	1	2	44.25	9.91979
155	4.25205	0	1	52	1	1	0	0	3	1	3	2	46.8	137	146	102	122	30	1.4	13.4	86	37	202.578	195.806	1.47	48.7	32.3	9.00041	3.28788	1.51748	0.985075	221.212	-0.237361	1	2	50.1	11.0377
156	1.89041	1	1	67	1	1	0	1	3	0	2	2	36.8	142	127	73	94	25	1.2	7.6	63	37	120.619	90.372	0.95	41.6	30	8.42571	4.54545	2.5	1.54688	128.283	-1.36173	2	4	41.75	7.58763
157	3.28493	1	1	66	0	1	0	0	2	0	1	1	40.3	134	183	84	52	21	1.3	17.2	37	11	123.325	107.206	1.16	38.7	30.2	8.33059	1.28415	0.959184	4.575	100	-1.39794	0	1	49.45	14.4444
158	4.09315	0	1	64	1	1	0	0	2	0	1	1	37.3	136	221	66	64	23	1.5	14.9	14	15	155.413	56.704	0.89	43.4	24.3	7.61635	1.78333	1.09184	2.6087	184.167	-1.43136	2	3	43.3	11.0682
159	1.48767	1	1	57	1	1	0	0	3	1	3	3	39.5	139	173	68	99	17	1.4	17.3	11	11	177.449	53.16	0.72	41.4	29	7.27909	4.27966	2.88571	2.87805	146.61	-0.69897	2	4	45.4	9.1224
160	5.23836	1	1	59	0	0	0	0	3	0	2	2	38.5	143	136	59	75	32	1.12	21.4	39	39	146.908	72.652	0.79	47.1	34.4	8.21633	6.02857	2.85135	1.16667	194.286	-1.23045	2	4	42	11.9195
161	7.58356	0	2	57	0	0	0	0	1	0	1	2	41.7	126	56	42	74	23	1.5	15.3	13	21	153.094	49.616	0.81	46.9	28.5	7.62759	3	2.40426	3.76667	49.5575	-1.51851	1	3	47.35	13.1962
162	8.42192	0	1	63	0	0	0	0	3	0	2	2	37.3	131	164	76	80	22	1.2	14.5	12	17	172.424	71.766	0.83	44.4	31.4	8.1934	3.97101	2.58491	2.3	237.681	-1.27875	2	4	40.75	9.46701
163	6.73425	0	1	53	1	0	0	0	3	0	2	1	37.3	124	224	81	56	17	1.3	17.1	23	18	170.104	45.186	0.98	41	28.8	7.68324	1.57895	1.16667	3.41026	168.421	-1.6902	2	3	43.95	9.97326
164	6.48767	0	1	65	1	1	0	0	2	1	3	1	41.4	122	137	56	89	14	1.4	5.3	18	9	176.29	53.16	1.05	51.3	29.3	7.50553	4.2766	2.5443	1.74074	97.1631	-0.954243	1	3	48.45	6.80921
165	1.61918	1	1	64	1	0	0	0	3	1	3	1	37.6	151	279	74	59	17	1.3	17.2	15	15	196.393	105.434	1.15	46	29.4	8.02779	1.33559	0.994949	4.21429	94.5763	-0.892095	2	2	52.35	11.5337
166	3.72055	1	2	55	0	0	1	0	1	0	1	3	39.3	134	241	73	61	24	0.9	23.2	15	11	215.723	34.554	0.85	38.1	46.1	7.46251	2.05	1.62376	4	150.625	-1.04139	2	2	47.3	9.6088
167	8.26027	0	2	53	0	0	0	0	2	0	1	1	48	117	265	81	92	13	1.9	11.8	13	11	180.929	81.512	0.82	45.4	25.2	8.24663	1.5	1.19008	4.8	138.021	-1.04139	0	0	57.6	14.4144
168	2.69863	0	1	51	1	1	0	0	3	1	3	3	43.5	140	242	72	57	17	1.3	6.9	27	13	154.253	93.916	0.82	38	32.7	8.24814	3.6	2.57143	3.5	172.857	-0.792392	1	3	50.5	11.7568
169	4.55068	0	1	59	1	1	0	0	1	3	3	2	42.3	131	144	72	44	19	1.5	14.2	14	16	159.279	77.968	0.87	42.5	28	8.16695	1.89944	1.54545	6.62963	80.4469	0.260913	0	1	51.25	13.2602
170	2.83562	1	2	67	0	0	0	1	3	1	3	2	40	129	198	46	89	16	1.1	14.1	15	10	215.336	63.792	0.81	43.1	35.6	9.04748	3.78761	2.64198	2.825	175.221	-1.13566	1	2	45.65	9.25926
171	7.83836	0	1	62	1	0	0	0	3	0	2	1	41.5	134	236	96	51	14	1.7	19.2	16	12	187.888	69.108	0.89	39.4	24.7	7.91222	4.65823	2.59155	2.25714	149.367	-1.49136	1	2	49.4	14.0678
172	6.43014	0	1	50	1	1	0	0	2	0	2	2	43.7	152	179	81	82	25	1.5	38.1	18	26	203.352	71.766	1.01	39.3	29.8	7.88891	1.10997	0.880109	5.29091	61.512	-1.77085	0	0	58.25	16.8726
173	7.84658	0	1	48	1	1	0	0	2	2	3	2	39.4	131	121	104	81	18	1.6	15.1	25	17	160.439	56.704	0.71	37.8	24.7	8.00492	3.2233	2.10127	2.575	117.476	0	2	4	44.55	12.236
174	6.85479	0	1	65	1	1	0	0	1	0	1	2	43.6	145	236	78	116	21	1.4	22.3	11	30	190.594	108.978	0.82	41.6	31.3	8.44652	3.675	2.77358	4.28571	196.667	-1.11394	1	2	49.6	12.4217
175	1.6274	1	2	52	0	0	0	0	3	1	3	2	42.2	113	197	68	68	19	1.8	10.9	11	8	204.125	97.46	0.87	49	23.5	8.1325	1.55502	1.14035	3.60345	94.2584	-0.564271	1	1	52.65	12.0917
176	2.12877	1	1	63	1	1	1	0	3	1	3	3	41.9	153	201	71	119	23	1.3	25.1	78	24	156.573	103.662	0.92	49.8	31.6	8.58582	1.33851	1.1372	8.05	62.4224	-0.845098	0	1	58	11.7039
177	3.71507	0	1	72	1	0	0	0	3	2	3	2	42.2	134	169	96	39	18	1.4	16.4	11	14	220.362	57.59	1.04	43.5	30.8	7.83981	3.51111	2.35821	2.72727	187.778	-0.767686	1	2	46.7	14.4521
178	3.53699	0	1	71	1	1	0	0	3	1	3	3	41.8	143	293	78	36	12	1.3	11.1	32	12	240.079	116.066	0.95	40.6	32.1	8.33267	2.13978	1.57937	3.95745	157.527	-1.13566	1	1	51.1	10.9711
179	6.27945	0	2	65	0	0	0	0	2	0	2	3	42.9	109	87	56	95	56	1.7	9.3	7	38	160.826	85.056	0.91	42.8	25.7	7.97554	2.83696	1.8777	2.875	94.5652	-1.6902	1	2	47.5	11.2895
180	5.89863	0	1	74	1	0	0	0	1	0	1	2	43.3	127	127	77	112	19	1.7	7.3	9	14	168.171	112.522	0.95	45.1	25	8.63777	3.79452	2.68932	3.10638	86.9863	-1.11394	1	3	50.6	9.53744
181	4.79726	0	1	46	1	1	0	0	3	1	3	2	46.5	148	378	56	69	31	1.7	24.7	157	34	197.166	145.304	0.82	45.4	28.1	8.87533	1.91266	1.2807	3.01316	165.066	-0.954243	1	1	57.95	10.6164
182	1.98904	1	1	50	1	1	0	0	2	1	3	2	43.1	155	243	85	77	22	1.7	18.6	14	18	191.367	82.398	0.89	43.1	25.2	8.38374	1.51852	1.05128	3.15	128.571	-0.531479	1	1	52.55	11.586
183	0.452055	1	1	74	0	0	0	0	2	0	2	2	39	132	120	80	64	37	1.1	18.3	28	48	161.212	151.506	1.19	51.3	35.2	8.62639	6.3253	3.88889	1.88636	144.578	-1.17609	2	4	43.15	12.9139
184	1.27945	1	1	57	1	1	0	0	3	1	3	2	47	170	199	80	102	43	1.5	38.5	155	55	182.862	155.936	0.78	52.3	30.8	8.65031	2.15075	1.57353	3.31667	100	0.477121	1	1	56.95	15.7718
185	8.01096	0	1	59	1	1	0	0	3	0	2	1	45.2	153	143	72	67	19	1.9	27.1	23	13	190.98	67.336	0.87	45.9	23.8	8.05942	1.74138	1.46377	8.7	82.1839	-1.17609	0	0	53.9	14.7231
186	1.19178	1	2	60	0	0	0	0	3	0	2	3	41.6	134	168	61	62	24	1.2	13.9	15	15	243.558	101.004	0.74	50	34.3	8.23066	2.31538	1.07885	2.6	129.231	-0.69897	1	1	48.1	10.297
187	7.8137	0	1	59	1	1	0	0	3	0	2	2	33.2	118	159	54	35	21	1.5	4.3	14	23	156.573	62.906	0.57	42.8	22.3	7.86057	3.60769	2.4555	2.16667	122.308	-1.11394	2	4	39.7	15.6604
188	8.14521	0	1	65	0	0	0	0	3	0	2	2	41.1	140	193	89	60	20	1.5	18.6	14	13	215.723	57.59	0.88	41.5	26.7	7.86001	2.10106	1.75556	6.26667	102.66	-1.36173	0	0	50.5	12.8037
189	4.50685	1	1	68	0	0	1	0	3	0	2	2	43.6	147	162	73	53	17	1.18	15.6	27	13	255.929	84.17	0.89	46.2	37	8.50187	4.37984	2.89744	2.58	125.581	-1.04139	1	2	50.05	10.6341
190	0.827397	1	1	57	1	1	0	0	4	0	3	2	34	140	213	72	62	11	1.2	6.6	30	8	186.341	116.952	0.92	42.8	29.1	8.71685	3.34247	1.93651	1.825	145.89	-1.54407	2	3	41.3	5.98592
191	3.73151	0	1	64	0	0	0	0	3	1	3	1	46.4	144	108	65	76	22	1.4	9.6	25	14	175.903	156.822	1.06	44.7	32.9	8.94428	0.838188	0.67979	5.72222	34.9515	-1.02531	0	1	61.85	16.5714
192	1.64932	1	1	62	1	1	0	0	3	1	3	3	42.1	165	214	88	62	23	1.3	29.4	19	16	199.486	74.424	0.86	43.4	32.3	7.75977	2.51748	1.63636	3.575	149.65	-0.636822	1	1	49.25	9.19214
193	5.99452	0	1	53	1	0	0	0	1	0	1	2	42.8	134	234	80	60	20	1.6	25.7	13	17	149.614	71.766	0.76	46.2	27.6	7.8135	1.53333	1.20149	4.375	111.429	-0.845098	1	2	53.3	14.1722
194	1.08767	1	2	62	0	0	0	0	3	0	2	2	46	136	144	81	57	14	1.6	14.6	23	13	214.95	243.65	0.96	47	28.5	9.42815	1.83978	1.6087	9.05	79.558	-1.27875	0	0	55.05	13.2184
195	6.34247	0	2	58	0	0	0	0	3	0	2	3	49.6	130	136	60	107	27	1.4	14.4	14	28	209.151	144.418	0.81	49.4	34.9	8.83197	1.75661	1.33871	4.5	71.9577	-1.32222	0	0	59.05	11.1964
196	2.29863	1	1	69	1	1	0	0	3	2	3	2	40.1	128	262	65	77	27	1.5	17.7	16	21	165.078	60.248	1.14	56.6	26.9	7.68946	2.05263	1.06226	1.15652	196.992	0.0871502	1	2	46.75	13.5473
197	2.73973	1	2	66	0	1	0	0	3	1	3	2	37.5	99	83	66	50	22	1.5	16.9	9	13	159.666	62.02	1.11	49.1	25.2	7.57458	1.53061	0.9375	3.0625	84.6939	-0.221849	2	3	42.4	10.8069
198	3.7589	1	1	72	1	1	0	0	3	0	2	3	34.4	134	398	63	91	22	1.4	14.1	15	13	185.568	92.144	1.44	52.1	25.4	8.30367	1.61538	0.849711	1.75	218.681	-1.04139	2	2	43.5	8.47291
199	2.06027	1	2	60	0	1	0	0	3	2	3	2	37.3	110	120	51	82	27	1.2	5.2	16	32	163.145	52.274	0.75	43.4	30.7	7.50698	1.48701	1.08531	3.7561	77.9221	-0.610333	2	3	45	10.843
200	4.6274	0	1	76	1	1	0	0	2	1	2	2	39.1	132	200	93	62	19	1.5	17.2	13	10	148.068	81.512	1.06	51.8	26	8.21934	2.02256	1.40838	3.69444	150.376	-0.255273	2	3	45.75	14.6992
201	5.87671	0	1	58	0	0	0	0	1	1	2	1	34.5	123	210	89	63	17	1.5	14.5	13	9	148.841	54.932	0.78	41.8	23.6	7.59957	1.3697	0.856061	2.61905	127.273	0.564271	2	3	42.75	14.1975
202	0.613699	1	1	65	0	0	0	0	4	2	3	3	41.3	131	280	88	63	23	1.2	9	17	7	107.088	69.994	0.97	45.4	34.1	8.10196	2.3	1.48756	3.61111	215.385	0.159701	1	2	47.8	11.1022
203	7.3589	0	1	74	1	0	0	0	3	0	2	2	36.6	143	248	81	55	29	1.4	14.6	38	19	173.197	64.678	1.31	54.3	26.1	7.76289	4.57738	2.94636	1.84615	147.619	-1.11394	2	4	45	5.25862
204	6.6	0	1	70	0	0	0	0	2	0	2	2	37.8	122	130	72	41	17	1.5	16	17	9	144.975	53.16	0.82	46.8	24.9	7.66792	3.34646	2.2973	2.70213	102.362	-1.61278	2	4	44.15	10.618
205	8.69589	0	1	61	1	0	0	0	2	0	2	2	36.8	113	286	48	66	18	1	16.9	13	11	103.222	68.222	0.67	42.9	37	8.60379	2.40268	1.86458	7.45	191.946	-1.27875	1	2	44.25	9.55844
206	3.55068	1	2	60	0	0	1	0	3	0	2	2	47.8	118	105	73	171	30	1.5	12.5	24	12	195.62	84.17	1.13	46.9	31.4	8.50033	1.0787	0.906615	6.35294	48.6111	-0.954243	0	0	58.6	10.2355
207	3.23562	1	1	64	0	1	0	0	3	0	2	1	37.7	117	198	84	45	22	1.4	4.8	12	17	147.681	119.61	0.84	43.1	26.2	8.38018	4.47475	3.01361	2.53846	200	-1.39794	2	4	42.65	10.3857
208	4.09863	0	2	71	0	0	1	0	1	0	1	2	36.5	123	187	55	132	20	1.2	6.3	10	9	201.032	79.74	0.9	46.1	30.2	8.08672	1.75806	1.23164	3.93651	75.4032	-1.32222	2	2	48.9	8.56808
209	7.44658	0	2	54	0	0	0	0	3	0	2	2	45.4	131	124	57	69	15	1.9	10.8	12	13	175.516	93.916	0.87	47.1	24.2	8.3669	1.6044	1.17742	3.64	68.1319	-1.49136	1	2	54.5	16.2724
210	5.44932	0	1	51	1	0	0	0	3	0	2	2	45.1	166	154	80	80	23	1.5	36.7	18	21	218.816	64.678	0.77	44.9	30	7.70951	1.77564	1.4734	6.5	49.359	-1.27875	0	0	60.7	12.1892
211	2.75342	1	1	61	1	1	0	0	3	1	3	3	42.4	127	127	53	71	46	1.4	21.7	165	49	149.614	92.144	0.9	49.8	31.1	8.31389	5.1413	2.28502	1.04545	138.043	-0.477121	1	3	47	12.8875
212	4.90411	0	1	55	1	1	0	0	1	1	2	3	42.3	130	114	91	61	26	1.2	12.1	22	14	216.496	105.434	1.09	45.2	35.4	8.405	1.71296	1.05714	2.16	105.556	-0.69897	1	1	47.7	15.3261
213	4.57534	1	1	62	1	0	0	0	3	2	3	2	41.2	154	223	89	79	18	1.4	21.6	64	24	223.068	101.004	0.81	47.5	30.4	8.37263	2.85625	1.96137	2.75862	139.375	-0.407485	1	1	49.2	10.8995
214	2.1863	1	1	80	1	1	0	0	3	0	1	2	52.1	173	154	114	81	45	2	12.6	103	35	218.042	184.288	1.41	44.8	25.6	8.91558	3.42574	2.10976	1.80357	76.2376	-0.69897	1	2	62.2	16.8608
215	5.5863	0	2	65	0	0	1	0	3	0	2	2	37.9	133	245	62	114	12	1.3	7.8	12	13	174.743	144.418	0.99	41.9	29.4	8.44809	0.929487	0.617021	6.11765	78.5256	-1.17609	1	2	53.5	10.8286
216	6.53973	1	1	69	1	1	0	0	1	0	1	2	44.5	138	141	78	78	29	1.5	12	14	21	158.893	70.88	1	45.4	28.8	8.08352	2.42149	1.56684	2.42	116.529	-1.4624	1	2	50.55	17.5197
217	1.76438	1	1	64	1	1	0	0	4	2	4	2	40	117	189	83	122	19	1.3	14.2	24	19	165.078	293.266	0.89	68.9	30.7	9.45934	0.796875	0.619433	4.68293	98.4375	-0.571391	0	1	49.6	9.28074
218	8.00548	0	1	59	1	1	0	0	3	0	2	1	48.6	148	129	90	109	30	1.6	11.9	16	29	227.707	125.812	1.06	45.7	31.1	8.68067	2.82123	2.24444	5.96667	72.067	-1.61278	0	0	57.55	10.4516
219	5.8274	1	1	46	0	1	0	0	3	0	2	2	47.8	163	177	120	59	24	1.3	28.5	67	23	180.156	150.62	0.99	43	35.5	8.87969	1.83471	1.24719	4.03333	73.1405	-1.36173	1	1	59.9	14.5289
220	8.50137	0	1	68	0	0	0	1	2	0	2	1	40.6	84	150	57	69	22	1.5	19.8	13	20	100.129	71.766	0.84	72	26.4	8.80859	2.32456	2.12	11.4	131.579	-1.23045	0	1	46.3	12.2289
221	2.70959	1	2	73	0	0	0	0	3	0	2	1	42.4	106	202	59	62	20	1.3	9.5	11	11	202.578	92.144	0.77	44.7	33.7	7.50903	9	6.3	2.25806	288.571	-1.4624	1	2	45.9	8.0916
222	4.81918	0	1	59	1	1	0	0	3	1	3	3	40.3	133	164	58	70	17	1.4	7.2	17	11	176.29	217.956	0.92	56.9	29.3	9.49549	2.66165	1.5	1.54651	123.308	-0.636822	1	2	46.95	9.90172
223	5.80274	0	2	64	0	0	0	0	4	0	3	1	28.6	105	150	50	47	30	1.2	2.5	6	12	122.166	50.502	0.61	43.3	23.8	7.62775	6.78378	3.63768	1.23333	405.405	-1.81291	2	4	30.45	6.13734
224	2.61644	0	1	73	1	1	0	0	3	1	3	2	43.1	139	154	92	64	27	1.6	20.8	20	19	199.099	76.196	1.01	47.6	26.6	8.09915	1.96644	1.48731	3.31111	103.356	-0.146128	1	1	50.55	15.2297
225	1.87671	1	1	65	1	1	0	0	3	1	3	1	45.5	146	123	84	78	26	1.9	10.1	22	15	190.207	132.014	0.61	46	24.5	8.58643	1.59091	1.23529	6.6	62.1212	-0.477121	0	0	55.4	13.5821
226	3.33151	0	1	65	1	0	0	1	1	2	3	2	37.6	144	106	72	108	17	1.2	23.4	101	26	146.521	95.688	0.83	49.9	31.5	9.04172	2.68595	1.58537	2.42	87.6033	-0.283997	2	3	43.65	10.9302
227	2.83014	1	1	62	1	1	0	0	3	0	2	2	38	90	173	65	94	18	1.4	15.9	12	10	158.893	62.02	0.61	49	27.2	7.7234	4.56818	3.40678	3.66667	131.061	-1.39794	2	4	44.6	10.2426
228	3.2411	1	1	71	0	1	0	0	4	0	2	3	37.9	123	180	77	52	20	1.2	14	24	20	225.001	77.082	1.04	53.8	31.3	8.10234	2.42953	1.66055	2.66071	120.805	-0.954243	2	2	45.35	10.327
229	0.860274	1	2	69	0	0	0	0	3	0	2	2	45.3	119	276	88	81	29	1.3	21.2	13	16	277.192	95.688	1.22	49.2	36.1	8.47212	3.02793	2.37719	3.97778	154.19	-1.59106	1	2	54.25	9.0239
230	7.64384	0	1	66	1	0	0	0	2	0	2	2	37.5	128	152	72	71	26	1.4	11.7	15	20	152.707	54.046	0.92	49.6	27.6	7.69999	1.27222	0.912351	6	84.4444	-1.39794	1	2	46.5	13.9405
231	3.4274	0	1	54	0	0	0	0	3	1	3	3	42.8	151	287	80	59	23	1.3	18.9	31	36	298.455	106.32	1.05	43.3	33.5	8.43021	2.78808	1.92237	3.08163	190.066	-0.531479	1	1	50.35	13.0091
232	1.3863	1	1	52	1	1	1	0	1	2	3	2	39.4	154	333	66	44	20	1.4	23.7	47	8	183.248	90.372	0.81	46	29.1	8.33431	2.30667	1.69608	3.06122	222	-0.385351	2	2	46.9	8.60262
233	4.27671	1	1	64	1	1	0	0	1	1	3	2	39.9	147	177	78	70	20	1.8	17.1	21	18	162.759	131.128	1.07	41.6	22.1	8.42923	1.825	1.19672	2.85714	88.5	-1.23045	2	3	49.9	11.5988
234	3.36164	1	2	58	0	0	0	0	3	2	3	2	39.5	132	296	43	86	28	1.4	9.1	14	28	202.192	53.16	0.83	45.2	27.6	7.77596	2.26061	1.57384	3.3	179.394	-0.0871502	2	2	47.75	9.68137
235	5.30411	0	2	68	0	0	0	0	3	0	2	1	40.5	121	125	65	110	20	1.3	7.7	9	18	202.192	116.952	0.93	46.6	30.1	8.52343	2.28814	1.8	4.37037	105.932	-0.69897	1	1	46.4	10.7143
236	6.62466	0	2	60	0	0	0	0	1	0	1	2	41.9	130	167	64	95	26	1.4	8.5	10	22	191.754	68.222	0.74	43.8	29.5	7.99277	3.03546	2.22917	5.22222	118.44	-1.23045	0	1	48.95	12.2874
237	2.89589	1	1	66	1	1	0	0	2	1	2	3	38.9	146	158	105	110	29	1.3	7.7	16	27	226.548	105.434	1.25	43.3	30.6	8.28323	2.21287	1.47525	3.48276	78.2178	-0.564271	2	2	49	8.18947
238	4.28219	0	1	69	1	1	0	0	1	2	3	2	41.1	133	148	66	79	27	1.5	15.9	12	17	122.166	58.476	1.08	54	28.2	7.62938	2.02013	1.44019	3.23913	99.3289	-0.920819	1	2	48.55	12.7245
239	2.67945	0	1	63	1	1	0	0	3	1	3	3	40.8	124	274	83	56	36	1.4	10.9	51	54	141.496	96.574	0.99	46.5	30	8.14882	1.92063	1.35955	3.25862	144.974	-0.801632	1	2	50.25	11.087
240	4.48219	0	1	64	1	1	0	0	2	0	1	1	40.9	120	80	83	71	21	1.4	24	15	14	144.202	79.74	1.12	46.6	28.4	8.07785	1.81522	1.5463	7.66667	43.4783	-1.27875	0	1	50.1	11.4566
241	2.75068	0	1	65	0	1	0	0	2	1	3	2	35.3	116	204	76	35	21	1.2	9.8	28	17	106.702	77.968	0.75	38.7	29.6	8.06865	1.19626	0.901408	6.90323	95.3271	-0.801632	1	2	46	9.09794
242	4.76164	0	1	62	1	1	0	0	1	0	1	3	40	136	104	74	54	36	1.4	13	18	53	165.851	56.704	0.96	45.3	29	7.71667	1.83333	1.11009	2.69388	78.7879	-1.17609	1	2	46.6	14.3885
243	1.88767	1	1	58	1	1	0	0	4	3	4	2	41.3	143	239	76	74	19	1.4	5.4	15	20	208.377	117.838	0.81	47.2	30.4	8.60553	4.72932	3.12935	2.14516	179.699	0.884607	1	2	47.95	8.34343
244	3.65479	1	1	64	1	1	0	0	2	0	2	1	36.4	129	81	71	62	23	1.5	12.1	42	20	175.13	108.092	0.8	46.1	24.4	8.30572	2.11702	1.41135	2.76471	86.1702	-1.51851	2	3	41.1	11.4826
245	6.18082	0	2	58	0	0	0	0	2	0	2	3	38.5	112	174	59	63	16	1.4	13.7	12	12	142.655	94.802	0.94	43	27.3	8.48597	1.91558	1.31111	4.05263	112.987	-1.04139	2	3	46.2	12.3794
246	1.8137	1	2	69	0	1	0	0	3	0	2	1	33.5	137	142	49	84	22	1.1	8.7	29	13	246.264	197.578	0.72	41.8	31.5	9.45883	2.92667	1.98643	2.30769	94.6667	-1.27875	2	2	41	5.83624
247	4.24658	0	2	63	0	0	0	0	3	0	2	3	41.8	110	121	55	83	27	1.6	9	9	18	190.594	70.88	0.81	47.5	26.3	7.81919	1.17424	0.794872	3.77143	91.6667	-1.43136	1	1	48.4	13.4405
248	3.43562	1	2	59	0	0	1	0	4	0	3	2	43.1	137	180	55	82	21	1.5	19.4	20	16	213.017	78.854	0.89	44	28.2	8.22114	2.1962	1.55605	3.3617	113.924	-1.43136	1	1	51	12.9819
249	4.47123	0	1	55	0	1	0	0	3	0	2	2	49.1	170	206	78	40	21	1.6	13.3	47	20	316.239	214.412	0.99	46.3	29.8	8.96877	1.75806	1.29249	4.13333	110.753	-1.27875	1	1	58.4	13.1283
250	2.49315	1	2	77	0	0	0	0	3	1	3	1	39.4	128	268	49	95	19	1.3	11.7	11	9	185.181	101.89	0.81	39.9	29.6	8.30726	3.02083	2.02326	3.69231	186.111	0.255273	2	3	46.6	9.09931
251	2.17534	0	1	66	1	1	0	0	2	1	3	3	39.5	134	142	69	78	24	1.5	11.5	10	19	163.532	54.046	0.93	47	26.3	7.62214	3.98592	2.06569	3.08696	200	-1.17609	2	4	43.05	13.0363
252	3.67945	1	1	64	1	1	0	0	3	1	3	2	39.2	140	93	62	59	32	1.4	14.3	26	57	130.671	78.854	0.7	43.6	27.2	7.92066	2.31707	1.39024	1.70833	75.6098	-0.342423	2	3	45.35	12.1362
253	4.02192	0	1	63	1	1	0	0	3	0	2	2	43	124	155	97	63	22	1.6	10.7	15	13	175.903	72.652	0.98	48.3	27.1	8.00679	1.86066	1.17617	3.21053	127.049	-1.11394	1	2	49.1	14.5763
254	7.46849	0	1	53	1	1	0	0	2	2	3	2	43.5	152	270	92	84	20	1.7	15.6	22	12	159.279	74.424	0.94	38.7	25.9	7.95392	1.63838	1.24719	6.775	99.631	-0.51663	0	1	57.05	10.5839
255	7.92603	0	1	67	1	1	0	0	3	0	2	2	41.8	139	156	75	89	16	1.6	17.2	16	10	172.81	56.704	0.81	43.7	26.8	7.87987	2.38278	1.59615	2.6125	74.6411	-1.49136	1	2	52.25	11.3279
256	1.6	1	1	73	1	1	0	0	3	1	3	1	24.9	114	134	76	67	34	0.9	2.7	11	20	180.929	103.662	0.92	49	26.7	8.30393	14.9863	8.68254	1.46	183.562	-0.221849	2	3	28.55	8.70629
257	3.1726	0	2	72	0	0	0	0	2	1	3	2	41.3	126	330	56	91	23	1.1	5.9	17	17	199.486	105.434	0.92	42.6	36.5	8.58697	2.47101	1.71357	3.28571	239.13	-0.623249	1	1	48.2	14.4406
258	3.14795	0	1	56	1	1	0	0	3	1	3	1	45.5	139	196	80	70	17	1.7	25.6	14	16	174.357	60.248	1	45.6	27	7.80862	1.75916	1.4359	6.36667	102.618	-1.11394	0	1	55.05	17.9134
259	0.961644	1	1	71	0	0	0	0	3	1	3	3	39.3	128	182	107	90	23	1.2	9	25	16	190.207	83.284	1.16	43	32	7.87224	3.17808	2.0531	2.24615	124.658	-0.531479	2	3	46.6	7.33209
260	4.09863	1	2	60	0	0	0	0	3	0	2	1	40.4	118	177	64	81	15	1.4	11.7	21	11	192.913	147.076	0.95	39.6	28	8.5258	3.22047	2.39181	4.23333	139.37	-1.36173	1	2	46.75	10.3061
261	2.71781	0	1	78	1	1	0	0	2	1	3	2	38	133	89	80	67	30	1	10.7	21	24	175.13	87.714	0.85	46.8	37.7	8.57042	1.69159	1.07101	2.89189	83.1776	-0.920819	2	3	43.35	13.3333
262	4.30411	0	2	63	0	0	0	0	3	0	2	3	41.2	121	318	53	57	32	1.3	17.4	18	39	189.434	75.31	0.94	32.6	31.8	8.15394	0.754902	0.557971	4.97561	155.882	-1.04139	0	0	51.4	12.7554
263	1.4137	1	1	53	1	1	1	0	3	1	3	1	46	166	81	74	117	27	1.4	17.9	15	23	161.212	85.942	0.86	41.4	33.1	8.16162	1.6875	1.26562	3.69231	42.1875	-0.146128	1	2	55.6	9.07298
264	4.19178	0	1	44	1	1	0	0	2	1	2	2	36.9	123	354	65	62	17	1.1	11.2	17	14	148.068	100.118	0.94	44.2	32.9	8.18234	1.46341	0.967742	2.97101	172.683	-0.636822	2	3	47.15	5.904
265	1.81918	1	1	68	1	1	0	0	4	1	3	2	40.1	133	187	61	63	18	1.2	12.6	11	10	198.712	83.284	0.95	47	32.5	7.99066	1.58282	1.27723	7.7619	114.724	-0.753328	0	0	48.25	9.52494
266	6.64384	0	2	64	0	0	1	0	2	0	1	1	41.5	119	186	64	79	13	1.7	8.4	17	9	197.553	122.268	0.92	44.5	24.2	8.73686	2.23214	1.59574	4.2	110.714	-1.43136	1	1	49.9	9.69626
267	4.26575	1	1	75	1	0	0	0	3	0	2	2	43.2	128	137	93	61	16	1.4	14.1	10	12	176.29	41.642	0.9	47.7	30.7	8.29658	9.51923	9	5.2	263.462	-1.39794	0	2	45.8	13.1707
268	2.27671	1	1	57	0	1	0	0	3	0	2	1	38.2	145	189	67	43	33	1.4	20.6	71	24	157.346	88.6	0.82	42	27.7	8.22252	1.10753	0.751825	2.86154	101.613	-1.23045	2	3	47.5	8.48889
269	5.34247	0	2	52	0	0	0	0	3	2	3	3	43.3	115	123	60	101	22	1.4	16.9	39	19	163.532	182.516	0.92	51.2	30.1	8.87194	2.98473	1.87081	2.78723	93.8931	-0.109144	1	3	49.85	8.74747
270	6.13151	0	1	75	1	0	0	0	3	1	3	2	39.2	131	284	80	96	14	1.3	15.2	30	7	153.867	104.548	1.16	44.8	29.6	8.28433	2.595	1.56798	2.5641	142	-0.845098	2	3	49.2	9.87406
271	2.48767	0	1	75	0	0	0	0	3	1	3	2	36.3	141	230	81	62	17	1	5.5	21	14	192.913	122.268	0.99	43.4	35.3	9.02101	3.27211	2.19635	2.53448	156.463	-0.763428	2	3	43.65	9.28389
272	3.08493	1	2	59	0	0	0	0	3	3	4	2	39.9	109	127	60	66	16	1.4	12.2	10	9	195.62	93.03	0.71	43.5	29.3	8.11394	2.22727	1.77108	5.5	96.2121	0.330993	1	1	46.5	11.4986
273	4	1	1	65	1	0	0	0	4	0	3	2	40.1	141	249	88	94	17	1.1	16.4	31	10	192.527	89.486	1.05	38.7	35.8	8.44916	2.67204	1.75618	3.72	133.871	-1.17609	1	1	49.4	6.22671
274	4.03288	0	1	55	1	1	0	0	3	0	2	2	38.3	132	209	84	70	14	1.4	16.3	11	15	149.228	55.818	0.87	43.8	27.1	7.67561	1.72308	1.1831	4.33333	107.179	-1.43136	2	3	48.05	13.1164
275	8.15342	0	1	70	1	1	0	0	3	0	2	2	43.8	156	147	79	81	27	1.4	14.7	38	39	197.939	135.558	0.94	44.1	31.1	8.67524	2.51429	1.87234	4.2	70	-1.43136	1	1	54.3	11.0606
276	6.26301	0	1	60	1	1	0	0	3	0	2	2	42.9	154	321	92	94	20	1.4	21.5	53	20	261.342	175.428	1.15	43.2	31.6	8.95979	1.60714	1.24615	4.5	127.381	-1.17609	0	0	55.5	11.7213
277	3.4411	1	1	69	1	0	1	0	3	0	1	2	44	127	162	82	84	21	1.6	8.7	10	13	161.985	66.45	1.17	50	27.1	7.80466	1.66667	0.753425	2.84483	98.1818	-1.43136	1	2	52.25	11.2821
278	2.94521	1	1	68	1	0	0	0	3	1	3	1	41.6	136	254	74	63	30	1.2	13.5	12	22	184.408	119.61	0.96	42.7	35.2	8.57477	1.93258	1.39837	4.2381	142.697	-0.662758	1	1	50.5	12.568
279	2.05753	0	1	66	1	0	0	0	4	1	4	2	34.8	109	306	43	92	19	1	9.6	31	15	172.81	100.118	0.87	51.8	33.6	8.3165	3.86239	2.8255	2.725	280.734	-0.237361	2	4	40.25	7.61488
280	4.34247	0	1	45	1	1	0	0	3	0	2	2	37.2	136	178	71	60	14	1.6	17.7	7	12	105.542	48.73	0.96	40.6	23.5	7.34765	1.39375	0.982379	3.90244	111.25	-1.32222	2	3	45.2	14.9398
281	2.67945	0	2	55	1	1	0	0	4	1	3	2	37	110	219	52	54	18	1.4	11.5	14	13	201.419	72.652	0.57	42.3	27.1	7.94616	3.6383	2.89831	4.47619	232.979	-0.717855	1	2	41.7	12.4579
282	3.97808	0	1	69	1	1	1	0	2	0	2	2	46.2	153	193	90	57	25	1.4	17.7	16	23	249.357	72.652	1.12	40.7	34.1	8.21456	4.01739	2.45745	1.94915	167.826	-1.61278	1	2	51.95	12.32
283	7.92877	0	1	71	1	1	1	0	3	0	2	3	44.1	132	111	84	64	21	1.6	18.5	14	12	199.872	80.626	0.86	46.6	27	8.3345	2.55828	1.95775	3.26	68.0982	-1.27875	1	1	52.25	12.3184
284	5.12877	0	1	66	1	1	0	0	3	1	3	2	36.9	119	124	67	41	20	1.6	13.3	18	13	217.269	88.6	0.85	50.5	22.9	8.09721	2.21384	1.36434	3.45652	77.9874	-1.01424	2	2	44.85	9.58442
285	7.79452	0	1	67	1	1	0	0	3	1	3	3	42.3	142	179	90	47	23	1.5	18	14	16	218.429	122.268	0.89	40.6	28.4	8.2788	1.17373	0.884984	4.72	75.8475	-0.146128	0	0	54.1	13.1366
286	2.52603	0	1	61	0	1	0	0	3	1	3	2	42	133	124	91	65	26	1.4	10.4	18	25	229.64	63.792	0.91	46.4	31	7.76628	2.536	2.0719	6.57895	99.2	-1.11394	0	0	48.25	10.5793
287	6.89589	0	1	50	1	0	0	0	2	0	2	1	42.6	146	198	74	70	20	1.8	22.3	17	15	194.846	54.932	0.89	48.2	23.8	7.54357	1.89498	1.31746	3.22059	90.411	-1.23045	1	1	53.55	11.7355
288	3.55068	1	2	63	0	0	0	0	3	0	2	2	41.2	119	81	87	87	20	1.8	12.8	10	8	211.084	85.056	1.08	49.1	22.7	8.05881	1.57554	1.1466	6.04348	58.2734	-1.27875	0	0	48.15	15.7854
289	5.96986	0	1	65	1	1	1	0	2	2	3	1	43.1	145	171	67	65	18	1.6	10.8	8	11	100.903	48.73	0.89	43.4	27.8	7.73984	7.28788	5.40449	2.75	259.091	-0.31742	1	3	46.4	11.8407
290	4.57808	0	1	68	1	1	0	0	4	0	2	2	36.6	110	187	65	66	22	1.2	1.1	13	12	134.15	61.134	0.86	46.5	31.3	7.63205	3.16265	2.14286	2.55385	112.651	-1.59106	2	4	44.9	7.625
291	0.556164	1	1	68	1	1	0	0	3	1	3	1	43.1	136	137	102	40	23	1.5	20.3	20	12	184.795	116.066	1.17	40	28.4	8.47961	2.28713	1.7907	6.3125	135.644	-0.564271	0	0	48.15	12.5656
292	2.16986	1	1	65	1	0	0	0	3	0	2	2	40.5	143	187	82	81	24	1.2	14.6	38	17	151.547	59.362	1.01	44.4	32.6	7.64186	1.81132	1.2973	3.18	117.61	-0.845098	1	2	48.45	7.68501
293	1.22192	1	1	56	1	1	0	0	3	0	2	1	40	123	177	51	77	29	1.5	9	80	29	173.583	68.222	0.68	51.2	26.9	8.07057	0.947368	0.734694	5.06667	116.447	-1.63347	0	1	47.6	12.5392
294	0.947945	1	1	64	1	1	0	0	3	1	3	2	46.5	137	225	91	97	27	1.4	15.7	25	32	201.419	149.734	0.9	44	32.5	8.89248	1.87261	1.42718	3.65116	143.312	-0.763428	1	1	54.35	12.2691
295	2.46301	1	1	50	1	1	0	0	3	1	3	2	44.2	166	260	73	86	19	1.7	15.3	33	21	173.197	95.688	0.84	40.5	25.6	8.24219	2.73756	2.12281	4.42	117.647	-0.477121	1	2	55.25	14.0317
296	6.48767	0	2	62	0	0	0	0	3	0	2	2	46.1	144	114	64	100	24	1.2	25.5	16	17	237.372	137.33	0.97	45.6	38.5	8.84416	2.22152	1.40964	3.29167	72.1519	-1.17609	1	1	54	10.9762
297	4.58904	0	1	66	0	1	0	0	1	0	1	2	42.7	132	219	117	102	18	1.5	17.7	21	13	167.011	85.056	1.38	46.7	27.9	8.1153	1.79874	1.27679	4.2973	137.736	-1.11394	1	2	50.65	14.9301
298	2.73973	1	1	63	0	1	0	0	3	1	3	2	41.1	126	142	79	57	24	1.4	16	19	17	146.908	54.046	0.88	45.4	29.7	7.67996	2.6791	1.70142	2.19672	105.97	-0.732394	1	2	47.8	9.90361
299	3.49863	0	2	61	0	0	0	0	1	1	2	2	40.9	133	257	53	160	23	1.3	12.2	38	29	197.166	137.33	0.71	40.2	30.9	8.54031	1.48684	1.25092	6.51429	112.719	-0.732394	0	0	52.3	15.1481
300	8.07945	0	1	64	1	1	0	0	3	0	2	1	44.7	142	190	63	87	28	1.4	18.1	19	18	230.8	93.916	0.86	50.9	31.2	8.23028	1.81461	1.56039	5.93333	106.742	-1.27875	0	0	53.6	13.3433
301	8.71781	0	2	67	0	0	0	0	3	0	2	2	43.6	129	146	68	43	9	1.4	12.6	14	10	228.867	168.34	0.94	46.7	30.7	8.99092	1.52	1.1875	4.5	64.8889	-1.23045	0	0	54.85	14.4371
302	3.64384	1	1	66	1	0	0	0	3	0	2	3	29.6	159	207	138	81	64	1.1	4.4	12	26	165.851	62.906	0.85	44.3	26.6	8.62227	10.3621	5.77885	1.31818	178.448	-0.208276	2	4	35.4	6.89977
303	7.33699	0	1	49	1	1	0	0	1	0	1	2	38.7	127	137	71	43	34	1.5	21.7	30	46	204.125	84.17	0.9	45.1	25.8	8.21726	2.31373	1.53247	2.04	134.314	-1.54407	2	2	43.8	13.0303
304	1.77808	1	1	71	1	1	0	0	4	0	3	1	39.5	131	221	83	76	20	1.4	4.1	11	5	143.429	75.31	0.97	45.4	28.2	8.19593	3.86	2.35366	2.7027	221	-1.11394	2	4	44.5	10.7337
305	8.23836	0	1	79	0	0	0	0	3	0	2	2	40.4	128	84	112	70	21	1.4	15.3	11	11	144.975	55.818	1.15	43.9	28.7	7.67794	2.39024	1.64706	2.73333	51.2195	-0.954243	1	2	48.6	10.1763
306	6.0274	0	1	73	0	0	0	0	1	1	2	3	45.4	136	146	59	94	29	1.2	13	19	16	155.8	90.372	0.93	46.4	36.7	8.03879	1.15556	0.737589	6.92308	81.1111	-0.221849	0	1	54.4	13.716
307	4.04932	1	1	67	1	1	0	0	3	1	3	1	37.3	124	176	68	67	28	1.5	17.7	23	14	184.022	69.994	0.97	51.8	25.3	7.71258	4.01961	1.64	1.64516	172.549	-1.01424	2	3	42.4	10.0539
308	8.32603	0	1	62	1	1	0	0	3	0	2	2	29.3	114	288	57	65	12	0.9	10.3	20	8	136.856	46.072	0.85	46.6	32.4	7.28019	3.75	1.97872	2.06667	232.258	-1.51851	2	4	35.5	5.49719
309	2.79452	1	1	67	0	0	1	0	3	2	3	1	35.8	107	272	115	58	13	1.1	10.5	14	7	125.645	87.714	1.36	40.9	33.2	8.27874	2.90323	2	2.58333	219.355	-0.196295	2	3	42	7.90287
310	5.37808	0	1	73	1	1	1	0	3	0	2	3	41.5	141	86	138	80	21	1.4	11.8	23	19	180.156	97.46	1.72	43.8	29	8.16795	2.60526	1.62295	2.81481	113.158	-1.23045	1	1	45.3	10.5598
311	3.43836	0	1	59	1	1	0	0	3	1	3	2	31.8	71	387	63	84	26	1.1	6	15	12	122.939	80.626	0.64	57.8	29.3	7.99314	1.41633	1.04204	5	157.959	-0.954243	1	2	44.05	11.5217
312	0.673973	1	2	56	0	0	0	0	3	2	3	2	41.4	111	102	56	87	24	1.2	14.7	14	19	182.475	86.828	0.81	43.9	34.2	8.12441	2.61871	1.76699	4.34375	73.3813	0.268845	1	1	48.35	9.6729
313	4.2411	0	1	65	1	1	0	0	2	2	3	2	42	144	234	74	42	33	1.6	28.5	41	38	210.31	167.454	1.23	46.1	26.9	8.92737	1.21028	0.782477	3.96296	109.346	-0.449969	1	1	52.7	16.6008
314	4.82192	1	1	63	1	1	0	0	1	1	3	3	43.7	140	128	65	82	22	1.5	16.1	13	21	172.424	93.916	0.84	48.6	28.2	8.48708	3.61682	2.52941	2.74359	119.626	0.367977	1	3	49.05	9.95444
315	7.91507	0	2	65	0	0	0	1	2	0	2	2	43.6	127	164	67	73	22	1.7	15.2	25	16	266.367	64.678	0.72	40.9	25.2	8.30826	2.26897	1.92398	7.25	113.103	-1.32222	0	0	50.85	11.752
316	4.76712	0	1	59	0	0	0	0	2	0	1	1	45.6	134	193	62	99	27	1.6	12.1	26	18	191.367	67.336	0.78	47.9	29	7.99001	3.51087	2.19728	2.2439	209.783	-0.845098	1	2	50.2	13.9877
317	2.98082	1	1	62	1	1	0	0	3	1	3	3	40.7	123	142	64	60	25	1.4	19.7	12	14	177.063	113.408	0.79	45.2	28.3	8.52153	1.03311	0.847826	7.94737	94.0397	-0.623249	0	1	48.25	11.1202
318	3.05479	0	1	51	1	1	0	0	4	1	4	2	40.4	149	185	88	66	13	1.8	15.7	11	15	201.805	127.584	0.88	41.4	21.9	8.44964	2.07643	1.39316	3.20408	117.834	-0.884607	1	1	48.25	13.931
319	7.79452	0	1	70	1	1	0	0	3	0	2	2	39.3	103	240	78	50	20	1.2	21.1	16	10	156.96	51.388	0.58	33.5	33.2	7.73803	2.19708	1.37443	1.95714	175.182	-1.04139	2	3	46.15	12.9276
320	6.66849	0	2	60	0	0	0	0	1	2	3	2	49.1	143	160	57	95	22	1.5	14.8	19	15	197.166	65.564	0.84	44.9	33.7	8.21123	4.14634	3.4	4.92	130.081	-0.827	0	1	55.25	15.4403
321	1.70411	1	1	67	1	1	0	0	3	2	3	2	42.2	132	302	73	44	20	1.3	29.5	23	9	264.048	64.678	0.82	49.8	33.3	7.7069	2.512	1.78409	3.28947	241.6	-0.51663	1	1	48.45	10.1199
322	6.22466	0	2	62	0	0	0	0	2	0	1	1	42.5	128	129	64	86	21	1.4	7.5	16	23	175.13	80.626	0.98	44.8	31	8.1196	1.90351	1.25434	3.16667	113.158	-1.23045	1	2	48.2	12.7628
323	2.62466	1	1	68	1	1	0	0	3	0	2	2	38.3	147	115	69	75	20	1.6	22.6	26	20	190.594	75.31	0.84	46.7	24	7.85909	1.07732	0.771218	3.40351	59.2784	-0.954243	2	2	48	16.7249
324	6.18904	0	1	59	1	1	0	0	1	1	2	3	37.7	117	135	47	75	56.3	1.1	20.4	174.5	70	165.078	139.102	0.85	58	35.1	8.85698	2.1338	1.53807	2.89796	95.0704	-0.636822	2	3	44.8	7.95359
325	4.77534	1	1	68	1	1	1	0	3	1	3	1	42	132	218	67	90	19	1.3	25.7	53	16	254.769	106.32	0.85	54.1	33.6	8.24496	4.02542	2.31707	2.68182	184.746	-0.69897	1	2	47.9	7.43363
326	1.43288	1	1	70	1	0	0	0	2	0	1	1	42.4	126	149	86	48	22	1.3	13.1	21	13	142.269	94.802	1.02	45.1	31.7	8.29445	2.9633	1.63959	2.36957	136.697	-1.17609	1	3	47.85	8.16956
327	6.18082	0	1	61	1	1	0	0	1	0	1	2	41.6	120	106	89	85	33	1.6	16.1	10	35	156.573	54.932	0.49	49.1	26.2	7.69847	1.26829	1	7.59259	51.7073	-1.17609	0	1	51.85	15.3506
328	6.79178	0	2	50	0	0	0	0	3	3	4	1	43	112	313	53	81	9	1.5	16.1	15	17	161.599	76.196	0.6	43.4	29	8.24253	1.07581	0.89759	6.925	112.996	-1.43136	0	1	56.85	14.3813
329	1.34521	1	1	57	0	0	0	0	4	2	3	2	37.6	134	290	77	72	16	1.2	12.2	11	11	163.145	93.03	0.77	43.4	32.5	8.56273	2.51163	1.81513	4.3	168.605	-0.39211	2	3	46.2	7.83333
330	3.9589	0	2	58	0	0	0	0	3	1	3	2	44.5	145	161	61	92	23	1.5	28.5	13	16	213.403	95.688	0.93	40.4	29.6	8.32066	1.07907	0.778523	3.83929	74.8837	-0.845098	1	1	55.25	14.7841
331	1.78904	1	1	52	1	1	0	0	3	2	3	1	38.8	126	204	76	82	12	1.4	6.7	18	8	189.434	93.916	0.99	45.9	28.1	8.16994	1.40293	0.964736	3.06742	74.7253	-0.646264	2	2	52.45	10.2375
332	2.25753	0	1	73	0	0	1	0	3	1	3	2	45.9	141	186	57	67	26	1.6	19.7	17	21	183.635	61.134	0.79	44	28.9	8.66737	4.94521	3.64646	4.05556	254.795	-1.42051	1	2	49.55	12.7855
333	1.78082	1	1	52	1	1	0	0	3	1	3	2	41.6	149	185	81	59	27	1.6	14.2	26	27	173.97	123.154	0.77	42.8	26.2	8.49453	2.01765	1.44726	3.33333	108.824	-0.414973	1	2	50.1	13.7748
334	4.57808	0	1	61	1	0	0	0	3	0	1	2	43	149	189	85	71	28	1.8	23.6	22	33	153.867	54.046	0.84	41.6	24.3	7.648	2.9	2.02326	3.87097	157.5	-1.23045	1	2	49	16.1654
335	1.29863	1	1	69	1	1	0	0	3	1	3	2	40.6	143	134	97	68	19	1.3	13.7	23	14	184.408	57.59	1.05	51	30.4	7.97512	3.42574	2.10976	2.06122	132.673	-0.564271	1	2	45.65	14.0972
336	2.58904	1	2	64	0	1	0	1	4	1	3	2	39.7	125	126	51	58.9	15.6	1.3	13.6	8.1	11	165.851	94.802	0.8	45.9	30.8	9.3201	2.3871	1.68182	3.36957	81.2903	-0.477121	2	3	47.45	8.61171
337	2.19452	1	1	61	1	1	0	0	2	0	2	2	37	121	185	95	60	14	1.9	6.9	18	13	145.362	92.144	1.03	52.6	19.1	8.07641	2.18557	1.38562	2.02083	95.3608	-1.11394	2	3	46.7	11.2121
338	2.81918	0	2	65	1	1	0	0	3	1	3	2	36.4	124	115	68	51	26	1.3	27.5	21	15	172.424	145.304	0.81	44.9	28.6	8.78349	2.06832	1.46696	3.65909	71.4286	-0.477121	2	3	44.45	13.3333
339	2.05753	1	1	67	0	0	0	0	3	1	3	2	39.1	137	130	72	76	23	1.2	19.5	23	28	225.774	124.926	0.98	44.5	33.3	8.75306	3.84783	2.42466	2.42105	94.2029	-0.636822	2	3	46	6.9697
340	0.780822	1	1	47	1	0	0	0	4	0	2	2	48.3	135	172	59	71	15	2	18.3	16	12	187.501	66.45	0.84	50.4	24.4	8.01108	4.60377	2.95161	2.30435	108.176	-1.43136	1	2	56.25	14.2899
341	7.83014	0	1	61	0	0	0	0	3	0	2	2	44.6	141	143	88	58	17	1.3	19.3	20	19	168.944	177.2	0.75	42	33.1	8.99587	2.69355	2.01205	6.2	115.323	-0.845098	0	1	50.8	10.5938
342	1.53151	1	1	60	1	1	0	0	4	3	4	3	38	103	303	74	81	40	0.8	6.2	41	37	158.506	79.74	0.97	53.5	48.7	8.33385	3.6519	2.47639	2.63333	191.772	-0.311249	2	4	45.9	6.06061
343	4.07671	0	1	67	1	1	0	0	3	0	2	2	39.6	128	160	83	62	27	1.5	14.6	52	20	207.991	106.32	1.03	56.5	26.9	8.43229	1.43827	1.07373	3.24	98.7654	-1.04139	2	2	47.7	9.87531
344	2.92055	0	1	65	1	1	0	0	3	1	3	1	35.2	127	222	58	40	23	1.1	19.8	18	16	207.991	63.792	0.85	50.4	32	7.99959	1.42932	1.06226	6.16129	116.23	-0.954243	1	1	44.75	10.1734
345	0.479452	1	1	67	1	1	0	0	3	1	3	2	33.7	113	179	103	78	27	1	9.9	19	10	192.527	49.616	1.19	50.9	32.7	7.83673	4.59574	1.4026	1.67857	380.851	-0.414973	2	3	36.05	8.2598
346	4.92055	0	2	74	0	0	1	0	1	0	1	1	37.3	109	150	60	40	19	1.2	7.5	13	9	162.372	103.662	1.09	43.4	32.2	8.42555	1.81667	1.40343	5.45455	83.3333	-1.11394	1	2	46.3	12.4749
347	3.96986	1	1	68	0	0	0	0	3	1	3	2	44.1	116	96	84	80	19	1.4	17.5	13	15	136.083	84.17	0.83	48.8	32.3	8.15612	3.02727	1.78075	5.5	87.2727	-0.414973	0	2	49.6	12.25
348	4.6	1	1	56	1	1	0	0	3	0	2	2	39.9	133	215	159	75	19	1.6	13.2	16	14	116.367	66.45	2.02	49.9	24.2	7.94336	1.85635	1.1831	3.23214	118.785	-1.32222	2	3	48.95	14.1993
349	4.05205	0	1	67	1	1	0	0	4	0	2	2	41.2	135	230	81	63	19	1.5	15.4	8	8	169.717	62.906	1.04	51.3	27	8.10017	1.86154	1.35955	3.02326	176.923	-1.36173	1	2	47.7	13.3766
350	7.31507	0	1	62	0	0	0	0	3	0	2	2	41.3	154	368	77	57	17	1.3	15.4	18	12	166.625	53.16	0.89	46.7	33	7.69441	2.91964	1.89017	2.07407	328.571	-1.43136	1	2	46.9	13.1949
351	1.63014	1	2	59	0	0	0	0	2	1	3	2	43.7	114	116	56	98	22	1.3	8.4	16	3	183.635	89.486	0.95	48.4	33.6	8.18196	4.1413	2.74101	4.6	126.087	-0.884607	0	1	48.3	7.97445
352	5.4411	1	1	57	0	1	0	0	3	3	4	2	40.9	117	109	103	66	15	1.9	12.4	19	17	179.769	76.196	1.15	50.1	21.2	7.83345	1.82166	1.40196	3.925	69.4268	0.69897	1	2	48.75	12.2823
353	8.15616	0	2	64	0	0	0	0	1	0	1	3	42.2	108	82	63	51	24	1.5	9.3	16	14	185.181	341.11	0.8	49.1	28.2	10.1384	1.6063	1.30769	4.23333	64.5669	-1.11394	1	1	48.55	13.7013
354	6.87397	0	1	42	1	1	0	0	2	0	2	3	44.1	146	215	80	92	74	1.2	8.8	9	9	167.011	81.512	0.7	42.5	35.3	8.32608	4.58865	2.55731	1.88	152.482	-0.954243	1	3	51.15	7.13592
355	0.539726	1	1	53	0	1	0	0	3	1	3	3	46.5	146	195	63	94	19	1.7	28.4	23	13	172.81	97.46	0.76	42.5	27.7	9.04466	1.17121	1.00669	8.03125	75.8755	0.69897	0	1	59.35	18.5259
356	8.03014	0	1	55	0	1	0	0	2	0	2	2	45.8	156	288	73	73	21	1.9	23.6	31	27	185.181	168.34	0.66	43	24	9.14776	1.71717	1.36	4.95	145.455	-1.17609	0	0	55.7	15.1656
357	3.48493	1	1	67	0	1	0	1	4	1	3	2	46.9	146	160	128	43	22	1.1	14.5	64	11	194.073	105.434	1.51	45.7	43.6	8.56006	2.14894	1.71186	7.05	113.475	-0.801632	0	0	53.95	9.1068
358	6.55342	0	1	64	1	1	0	0	3	1	3	2	38.9	130	142	72	99	17	1.1	9.9	15	9	148.068	62.02	1.04	46.4	35	7.7381	3.72308	2.14159	2.16667	109.231	-0.985277	2	4	45.4	10.21
359	0.824658	1	2	68	1	1	0	0	4	2	3	3	31.9	116	157	55	62	54	1.5	13.6	16	35	161.985	48.73	0.54	46.6	21.6	7.61391	12.1863	10.6239	5.66667	153.922	-0.255273	1	3	37	14.8372
360	4.53973	0	1	52	1	1	0	0	3	1	3	2	43.4	163	253	102	84	24	1.4	20.3	23	22	153.48	120.496	1.35	40	30.6	8.25297	1.18827	0.905882	5.0625	78.0864	-0.255273	0	1	59.6	10.1639
361	4.05479	0	2	66	0	0	0	0	1	0	1	3	38.4	135	268	69	135	19	1.4	19.7	20	12	165.851	130.242	1	39.9	26.5	8.68402	1.87273	1.39819	3.75	162.424	-1.43136	2	3	46.65	10.8782
362	2.52055	0	1	60	1	1	0	0	3	3	3	3	46.1	137	213	88	41	15	1.6	18.4	21	18	190.98	102.776	0.92	51.9	29.3	7.86651	1.09167	0.942446	8	88.75	-0.586266	0	0	58.1	14.2284
363	6.05205	0	1	64	1	0	1	0	3	1	3	2	42.3	135	156	76	56	32	1.5	8.3	46	48	149.228	80.626	0.9	41.8	28.6	8.12391	4.0431	2.12217	1.8125	134.483	-0.920819	1	3	48.1	14.1
364	4.81918	0	1	71	0	1	0	0	4	0	1	2	42.8	137	125	64	71	32	1.2	23.1	18	18	172.037	62.02	0.83	45.1	35.5	7.66231	1.80916	1.45399	5.69565	95.4198	-0.69897	0	1	49.35	9.6614
365	6.75616	0	1	62	0	0	0	0	3	0	2	2	37.9	134	280	102	76	19	1.2	12.9	12	7	214.563	81.512	0.9	42.2	30.7	8.08411	1.58148	1.2449	4.35484	103.704	-1.36173	2	2	51.4	7.58
366	1.01096	1	1	59	1	1	0	0	3	1	3	2	45.3	150	146	89	69	17	1.4	16.7	13	12	151.934	62.02	1.11	42	31.4	8.11477	3.41216	2.46341	3.7	98.6486	-0.69897	1	3	52.7	14.9505
367	1.1589	1	1	59	1	1	0	0	2	1	3	2	42.2	146	124	86	64	54	1.4	23	16	54	211.857	101.89	1.04	43.8	29.7	9.15326	2.64341	1.26766	2.58	96.124	-0.801632	1	1	48.65	14.1611
368	5.89863	0	1	68	1	1	0	0	3	1	3	1	34.9	104	210	73	51	19	1.5	17.1	22	15	122.552	42.528	0.89	43.2	24	7.13523	3.12676	1.73438	2.95833	295.775	-0.819544	2	4	38.45	14.6025
369	5.87945	0	1	42	1	1	0	0	1	0	1	2	46.5	164	120	85	58	30	1.9	27.7	13	30	139.176	106.32	1.15	45	24.3	8.2771	1.76437	1.21344	4.2439	68.9655	-1.17609	1	2	55.2	13.5174
370	3.21096	1	2	61	0	0	0	0	3	0	2	1	48.1	123	135	71	92	17	1.2	12.3	17	11	207.604	72.652	0.96	51	38.5	8.32978	1.44375	1.1608	4	84.375	-0.69897	1	1	56.1	9.43137
371	3.57808	1	1	57	1	0	0	0	4	3	4	3	39.9	138	190	71	40	31	1.8	22	28	14	167.398	92.144	0.4	42.9	21.7	8.21797	0.812865	0.553785	5.7	111.111	0	1	2	48.45	11.9461
372	8.08493	0	1	46	0	1	0	0	1	0	1	1	41.6	146	81	87	77	17	1.4	28.8	12	17	202.965	63.792	0.85	43	29.4	8.03925	3.20455	2.38983	4.4	61.3636	-1.11394	1	2	48.2	16.4427
373	6.79452	0	1	57	1	1	0	0	3	1	3	2	44.5	156	149	66	78	15	1.3	23.9	18	17	237.372	71.766	0.73	40.9	34.8	8.10379	2.10556	1.71493	5.625	82.7778	-0.801632	0	0	53.5	12.1253
374	0.161644	1	1	66	1	1	0	0	4	1	3	1	39.4	145	149	67	66	28	1.1	11.6	21	31	126.418	168.34	1.11	42.7	35.4	9.04061	1.98667	1.55208	4.54545	99.3333	0.69897	1	2	46.9	12.7097
375	0.460274	1	2	45	0	0	0	0	3	2	3	3	47.2	119	238	56	86	21	1.5	10.8	18	15	147.681	85.056	0.8	43.1	32.5	8.31013	4.04878	2.46535	3.15385	193.496	-0.407485	1	3	53.35	12.2917
376	0.512329	1	1	73	1	0	0	0	3	2	3	2	36.5	111	106	66	83	27	1.5	13.2	12	11	107.861	202.894	0.96	46.2	23.6	9.0403	3.79545	2.87931	4.4	120.455	-0.552842	2	4	40.9	8.07522
377	0.547945	1	2	77	0	0	1	0	3	1	3	2	37.4	125	200	78	82	19	1	12.3	27	11	211.47	50.502	1.03	53.2	36.4	8.04349	10.1667	7.46939	3.13043	277.778	-0.934498	2	3	41	9.49239
378	0.553425	1	2	68	0	1	0	0	2	1	3	2	39.1	130	239	45	68	16	1.1	13.7	10	6	233.506	189.604	0.81	41.9	34.8	9.10987	4.44286	2.50806	1.7284	170.714	0.673416	2	3	46.1	7.10909
379	0.767123	1	1	72	0	0	0	0	3	0	2	2	35	132	144	76	59	15	1.4	10.3	10	17	168.944	69.994	0.88	44.9	25.6	8.1246	6.25	3.62069	1.95349	171.429	-1.39794	2	4	39.2	9.97151
380	0.786301	1	1	46	1	1	0	0	3	1	3	3	40.9	154	242	61	77	21	1.2	21.5	23	24	168.558	118.724	0.67	42.5	34.8	8.553	2.47486	1.72374	3.08621	135.196	-0.564271	1	2	49.85	10.7916
381	1.04384	1	1	70	1	1	1	0	3	1	3	2	38.7	122	219	73	49	25	1.4	7.2	32	10	169.331	133.786	0.96	47.4	27.7	8.55903	3.07362	2.09623	2.62903	134.356	-0.537119	2	4	46.85	6.63808
382	1.21644	1	1	65	1	1	0	0	3	2	3	2	47.2	167	266	59	71	61	1.3	23.8	125	50	230.8	95.688	0.76	46	36.1	8.33316	0.900249	0.695568	4.26596	66.3342	-0.477121	1	1	67.25	13.1111
383	1.28493	1	1	59	1	1	0	0	4	0	3	2	39.1	137	229	82	64	11	1.2	11.6	16	13	202.578	105.434	0.78	41.1	33.8	8.64707	2.32075	1.65101	5.3	108.019	-1.17609	1	1	49.7	9.30952
384	1.33151	1	1	64	0	1	0	0	2	1	2	3	35.8	148	204	71	63.4	69.4	1	4.1	23.9	32.3	151.934	57.59	1.04	44	35.1	8.39064	11.8539	5.7027	0.946809	229.213	-0.477121	2	4	40.25	6.41577
385	1.4	1	1	69	1	1	0	0	3	2	3	2	24.3	73	111	70	26	39	1.4	5	7	21	86.5984	33.668	0.55	42.7	17.6	8.66398	19.0625	7.625	0.695652	346.875	-0.552842	2	4	25.9	12.15
386	1.41096	1	2	71	0	0	0	0	3	2	3	3	41.5	116	117	52	86	24	1.3	12	16	24	199.872	104.548	0.87	45.1	32.3	8.51269	1.3245	1	4.71875	77.4834	0	0	0	49.05	10.533
387	1.42192	1	1	56	1	1	0	0	1	0	1	2	42.4	140	120	80	68	20	1.4	22.4	17	15	225.774	132.014	1.05	47.6	29.6	8.57976	1.38235	1.1371	8.16	58.8235	-1.04139	0	0	52.6	13.9474
388	1.45479	1	2	63	0	0	0	0	3	2	3	2	39.1	121	172	51	102	22	1.4	8.5	14	13	127.578	70.88	0.42	40.9	27.6	8.0776	2.60748	1.73292	3.56667	160.748	-0.208276	2	3	44.45	11.6716
389	1.48493	1	1	65	1	1	0	0	2	2	3	1	43.3	123	132	76	89	15	1.4	15.5	19	20	246.651	126.698	1.04	49.8	32	8.64847	2.11765	1.65306	5.27586	86.2745	0	0	0	50.95	9.00208
390	1.58356	1	2	69	0	0	1	0	1	1	2	1	38.9	117	134	65	66	18	1.3	14.3	11	9	221.908	184.288	1.05	42.5	31	8.93542	2.57944	1.58621	3.24242	125.234	-0.636822	2	2	44.25	11.4076
391	1.69863	1	1	62	0	1	0	0	3	1	3	2	38.8	126	157	97	52	15	1.6	8.9	13	9	169.331	69.994	0.77	40.3	24.4	7.75936	2.84375	1.42188	2.13333	122.656	-0.564271	2	3	45.2	7.82258
392	1.70685	1	1	59	0	1	1	0	3	0	2	2	30.3	100	144	96	70	33	1.2	14.9	55	17	160.826	39.87	1.17	35.8	25.4	7.14415	6.375	3.09091	1.48837	225	-1.17609	2	4	33.5	5.61111
393	1.83014	1	2	65	0	0	0	0	4	3	3	2	39.1	120	173	66	73	15	1.1	11.1	28	23	163.532	138.216	1.04	50.4	34.3	8.66076	0.818667	0.677704	9.86842	46.1333	0.169142	1	2	57.85	11.0141
394	1.87123	1	1	51	1	1	0	0	3	1	3	2	29.4	146	109	66	62	42	1.4	14.7	17	31	161.212	94.802	0.62	43.1	21.3	8.15511	16.8049	9.70423	1.57692	265.854	-0.564271	2	4	31.45	9.70297
395	1.90685	1	1	52	1	1	0	0	3	0	2	2	45.9	151	113	85	56	31	1.9	13.9	26	40	204.125	136.444	1.04	43.6	23.9	8.72258	1.58594	1.14689	4.74074	88.2812	-1.43136	0	0	52.3	15.2492
396	1.91507	1	1	70	1	1	0	0	3	1	3	1	35.3	138	173	84	83	18	1.2	11	13	10	157.346	86.828	0.93	55.8	28.4	7.83364	2.93171	2.07958	2.73333	84.3902	-0.763428	2	3	45.55	6.25887
397	1.9726	1	1	53	1	1	0	0	3	1	3	2	40.7	149	245	68	103	19	1.1	13.6	23	11	176.29	100.118	0.94	50.4	35.8	8.00354	1.63694	0.908127	2.80357	156.051	-0.753328	1	2	48.55	9.18736
398	2.02192	1	1	52	0	1	0	0	2	2	3	2	30.6	121	222	70	33	35	1.5	7.7	26	18	156.96	61.134	0.47	43.2	20.7	7.59123	49.3902	9	0.22905	541.463	-0.221849	2	4	32.65	10.2
399	2.03014	1	1	54	1	1	0	0	3	1	3	2	43.6	141	260	85	84	20	1.6	16.8	18	14	153.48	91.258	1.08	45.5	27	8.07189	2.86512	2.02632	3.30769	120.93	-0.732394	1	2	54.35	13.5404
400	2.09589	1	1	64	1	1	0	0	3	1	3	2	42	121	256	70	91	26	1.4	11.1	19	19	172.037	75.31	0.78	43.6	30.3	8.12828	1.70588	1.26087	5.66667	150.588	-0.69897	0	1	50.5	11.7318
401	2.12329	1	1	73	1	0	0	0	3	1	3	2	41	129	136	85	65	32	1.1	11.1	19	22	188.661	65.564	1.07	45.8	36.8	7.90848	5.08696	3.54545	2.46429	197.101	-1.04139	1	2	44.45	10.8753
402	2.12877	1	1	67	1	0	0	1	1	0	2	2	44.7	144	204	68	83	23	1.6	16.1	18	22	150.774	71.766	0.85	42	27.7	8.16257	2.65025	1.5731	4.31915	100.493	-1.32222	1	2	54.85	14.2812
403	2.19178	1	1	53	1	1	0	0	3	1	3	2	42.4	146	235	73	96	21	1.7	18.7	34	19	171.65	114.294	0.82	46.5	24.7	8.27625	1.54365	1.021	3.07317	93.254	-1.06695	1	2	55	15.2518
404	2.35616	1	1	51	1	1	0	0	3	1	3	2	37.6	140	178	94	66	23	1.7	16.7	19	22	156.186	60.248	1.02	46.8	21.7	7.77502	3.94483	2.50877	2.78846	122.759	-0.636822	2	4	44.85	15.7983
405	2.44658	1	1	61	1	1	0	0	3	3	3	3	43	128	300	64	60	20	1.5	11.6	9	13	238.146	66.45	0.84	43.8	29	8.14461	4.86364	2.81579	1.80822	227.273	0.116506	1	2	49.6	11.1688
406	2.63562	1	1	64	1	0	0	0	3	1	3	3	37.2	126	252	55	97	27	1.1	8.1	18	17	112.887	54.932	0.74	42.3	33.8	7.85582	5.92035	4.15528	2.825	223.009	-0.753328	2	4	42.85	7.15385
407	2.69041	1	1	55	1	1	0	0	2	2	3	2	38.8	134	257	76	96	14	1.2	12	17	13	158.893	52.274	0.95	42	33.6	7.82143	3.87075	2.361	2.45	174.83	-0.324511	2	4	46.15	10.6887
408	2.69863	1	2	69	0	0	0	0	3	2	2	1	45.4	101	144	69	74	19	1.6	12.3	13	14	115.207	139.988	0.51	39.5	28.1	8.81025	3.27619	2.20513	2.625	137.143	-1.32222	1	3	50.65	12.3706
409	2.73699	1	1	66	0	1	0	0	2	1	3	2	37.7	126	185	75	49	20	1.5	17.9	15	14	159.279	45.186	0.95	41.3	26	7.36642	2.73913	1.82609	2.09091	201.087	0	2	3	42.3	15.3252
410	2.79178	1	1	58	1	1	0	0	1	1	3	2	38.7	145	196	120	60	19	1.3	11.3	12	10	178.609	81.512	1.44	45.3	29.5	8.12403	3.7	2.23276	2.12121	140	-0.985277	2	4	45.7	8.14737
411	2.87945	1	2	67	0	0	0	0	1	1	3	3	36.6	125	201	61	54	20	1.3	10.5	8	12	183.248	72.652	0.84	45	28.6	7.82316	1.02182	0.805158	5.97826	73.0909	-0.753328	1	1	50.35	9.48187
412	2.90411	1	1	57	1	1	0	0	3	0	2	1	38.7	121	314	75	92	26	1.3	6.9	57	34	170.104	79.74	0.82	52.9	28.7	8.02056	2.85577	2.00676	2.77333	150.962	-1.04139	2	3	49.1	5.40503
413	3.20548	1	1	62	0	1	0	0	3	1	3	2	35.9	142	142	69	63	17	1.2	9.7	15	12	148.454	64.678	0.71	45.5	30.2	7.75294	1.36216	1.05882	5.60606	76.7568	-0.414973	1	2	45.15	9.91713
414	3.21644	1	1	74	1	1	0	0	2	1	3	2	41.8	126	129	74	123	29	1.3	14.1	80	16	190.207	70.88	1.16	52.7	31	8.03925	3.04706	2.05556	2.65625	75.8824	-0.636822	1	2	50.3	9.92874
415	3.29315	1	1	66	1	1	0	0	3	0	2	2	41.8	183	321	73	37	25	1.4	64.5	12	17	223.841	76.196	0.7	45.5	28.9	8.03461	2.18707	1.6615	4.9	109.184	-1.17609	0	0	56.5	11.1765
416	3.29863	1	1	51	1	1	0	0	3	0	2	1	36.9	133	224	66	41	27	1.4	9.5	20	20	128.738	71.766	0.8	41.1	26.9	7.7032	1.24549	0.896104	3.01087	80.8664	-1.23045	2	3	50.75	11.0811
417	3.46849	1	1	62	1	1	0	0	3	0	2	2	40.2	130	198	64	80	25	1.4	8.3	9	3	155.413	116.066	0.79	46	29.1	8.98347	8.69	5.39752	2.04082	198	-1.59106	1	3	45.2	9.24138
418	3.53973	1	1	50	1	1	0	0	3	0	1	3	42.5	145	204	61	73	18	1.6	8.3	17	11	113.66	101.89	0.89	46.2	27.1	8.41239	3.08511	2.02326	2.31148	144.681	-1.63347	1	3	49.55	16.0985
419	3.58356	1	1	61	1	0	0	0	1	0	1	1	47.8	149	178	51	62	28	2.2	43.6	11	19	222.295	91.258	0.82	43	21.6	8.16953	1.80214	1.38683	3.74	95.1872	-1.4624	1	1	57.15	12.8841
420	3.60822	1	1	57	1	1	0	0	3	1	3	2	41.8	139	270	61	43	27	1.5	10.7	16	16	136.856	60.248	0.39	40.2	28.3	7.69441	2.64583	1.73973	3.84	140.625	-1.02531	1	2	51.4	9.16667
421	3.72329	1	2	70	0	0	0	0	2	1	3	2	39.6	101	115	68	40	2	1.6	9.3	10	2	152.32	407.56	0.65	63.9	24.5	9.93018	4.07216	1.83721	3.23333	118.557	-0.884607	2	4	44.45	12.6518
422	3.76712	1	1	48	1	1	0	0	2	1	3	3	38.8	143	80	82	113	30	1.2	18	18	25	116.367	71.766	1.05	43.3	33.7	7.88891	1.35398	1.04082	4.61224	35.3982	-0.884607	1	2	50.1	13.5664
423	3.76986	1	2	50	0	0	0	0	3	1	3	2	28.9	123	207	48	45	40	1.1	2.8	12	34	90.851	89.486	0.59	42.7	25.3	8.8302	7.28276	4.15748	1.45	142.759	-1.3862	2	4	36.15	7.54569
424	3.92603	1	1	47	1	1	0	0	4	0	3	1	46	129	213	87	94	17	1.9	10.8	35	8	212.243	108.092	0.72	44.7	24.6	8.38428	1.95804	1.55556	4.76667	148.951	-1.39794	0	0	53.15	10.7226
425	4.10959	1	1	54	0	1	0	0	2	2	3	2	43.2	136	120	80	76	20	1.8	11.2	19	19	163.918	69.994	0.73	46.2	23.7	7.98035	2.58252	1.72727	2.64103	116.505	-0.196295	1	2	48.35	15.7091
426	4.18082	1	2	72	0	0	0	0	2	0	2	3	43.4	116	176	73	70	24	1.1	8.6	5	8	198.712	85.942	0.87	60.7	39.1	8.27226	2.95402	1.57669	1.52632	202.299	-1.04139	1	1	47.75	16.1338
427	4.18904	1	1	66	0	0	0	0	1	0	1	3	39.7	131	77	76	54	32	1.4	19.6	15	47	151.161	108.978	0.93	51.1	28.5	8.11801	5.52941	3.20455	1.88889	75.4902	-1.17609	2	4	44.8	9.29742
428	4.38904	1	1	63	1	1	1	0	3	2	3	2	40.4	138	128	72	67	29	1.6	6.8	17	18	227.321	69.994	1	49.4	25.7	7.85662	1.77928	1.38596	4.93333	57.6577	-0.729459	0	0	51.5	13.2026
429	4.47671	1	2	67	0	0	0	0	1	0	1	2	34.8	110	122	62	50	26	1.2	11	9	17	201.805	79.74	1.04	45.1	28.2	8.12356	1.55155	1.31441	9.7	62.8866	-1.36173	1	1	44.5	9.23077
430	4.52329	1	1	56	1	1	0	0	3	2	3	2	45.8	140	327	58	55	13	1.8	10.7	18	7	175.13	76.196	0.9	41.3	26	8.43264	3.79054	2.8191	3.28889	220.946	-0.954243	1	3	53.2	13.921
431	4.68219	1	1	48	1	1	0	0	3	2	3	1	39.5	158	316	65	94	16	1.1	15.9	15	11	155.8	55.818	0.74	42.5	35.7	7.78376	1.56573	1.18472	4.05714	74.1784	-0.286307	2	3	60.8	8.38641
432	5.02466	1	2	62	0	0	0	0	1	0	1	2	30	79	88	44	58	32	1.7	8.4	7	47	89.3046	91.258	0.59	64.9	18.1	8.34602	6.61702	3.14141	1.23684	187.234	-1.4624	2	4	32.35	13.3929
433	5.34247	1	2	67	0	0	0	0	3	0	2	2	38	112	179	63	58	14	1.5	8.7	14	11	131.831	72.652	1	46.8	25.5	8.00679	2.02857	1.57778	5	102.286	-1.32222	1	2	46.75	11.0465
434	5.44932	1	1	66	1	1	0	0	3	0	2	3	38.2	140	125	69	41	17	1.4	10.8	10	11	150.001	99.232	0.69	43.2	27.3	8.28308	2.78049	1.81915	3.32432	101.626	-1.27875	2	3	44.35	16.8282
435	5.49863	1	1	65	1	1	0	0	3	0	2	2	38.5	136	96	84	104	26	1.5	14.1	40	21	193.687	96.574	0.83	46.2	25.8	8.35677	3.07547	2.43284	5.3	90.566	-0.845098	1	2	43.8	11.6667
436	5.57534	1	1	71	1	1	1	0	3	0	2	2	35.5	143	127	114	70	26	1.4	12.1	19	21	144.975	55.818	1.42	50.8	25.3	7.44603	2.97596	1.71468	2.08	61.0577	-1.54407	2	4	45.9	9.14948
437	6.23836	1	2	55	0	1	0	0	3	0	2	2	37.5	125	133	74	73	22	1.3	8.9	13	20	218.816	211.754	1.12	41.3	29.2	8.92129	0.951923	0.727941	4	63.9423	-0.477121	2	2	47.9	11.3293
438	6.32329	1	2	67	0	0	0	0	2	0	2	2	45.5	138	238	56	87	17	1.4	15	13	12	191.754	83.284	0.81	38.5	31.4	8.24479	2.53165	1.90476	5.26667	150.633	-1.04139	0	0	53.4	14.1304
439	6.33425	1	1	57	1	1	0	0	1	1	2	2	39	134	173	88	70	25	1.2	22.2	20	21	223.455	182.516	0.83	50.2	33.2	9.0333	1.24567	0.972973	5.78	59.8616	-0.801632	1	1	53.45	9.39759
440	2.0274	0	1	52	0	0	0	0	3	1	3	2	40.7	123	226	97	66	20	1.4	13	11	17	180.542	90.372	1.01	44.4	30.1	8.32647	3.02273	1.72727	2.14634	256.818	-1.17609	1	2	45.1	11.9706
441	2.04384	0	2	61	0	0	0	0	4	2	3	1	34.6	115	220	50	59	23	1.1	14.7	17	20	260.182	168.34	0.76	42.7	32.3	8.97762	7.18269	5.22378	4.52174	211.538	-0.845098	1	2	39.8	9.40217
442	2.08493	0	1	59	0	0	0	1	2	1	4	2	43.2	147	185	92	114	11	1.3	12.3	20	9	157.346	143.532	1.06	39.8	33.7	9.4783	2.5188	2.0303	4.58621	139.098	-0.845098	0	1	49.85	9.31034
443	2.11507	0	2	66	1	0	1	0	2	1	2	2	42.7	99	236	73	70	33	1.1	4	24	40	261.342	85.056	0.92	63.7	37.9	8.21331	2.33333	1.6556	3.28846	138.012	-1.13566	1	1	51.25	12.2701
444	2.17534	0	1	70	0	0	0	0	2	1	3	2	33.7	134	261	86	48	17	1.4	9.4	24	9	187.888	77.082	0.96	46.9	24.4	7.94819	1.77305	1.38889	4.40625	185.106	-1.21307	2	2	40.75	9.54674
445	2.23836	0	2	61	0	0	0	0	3	3	3	3	43.9	132	214	56	72	20	1.2	11.5	13	12	214.563	64.678	0.85	46.2	36.4	7.86627	2.54787	1.98755	4.37209	113.83	-1.0086	1	1	53.3	15.5674
446	2.49863	0	1	58	1	1	0	0	3	2	3	2	45.3	153	201	93	75	26	1.4	23.6	21	9	152.707	178.086	0.92	46.5	31.8	8.94184	1.26838	1.09524	8.77419	73.8971	-1.15635	0	1	58.9	14.2453
447	2.60274	0	1	67	0	0	0	0	3	2	3	2	36.9	95	233	91	40	17	1.3	10	14	12	193.687	78.854	1.23	52.1	27.8	7.96107	1	0.724138	6.125	158.503	-1.11394	1	1	44.25	10.9821
448	2.71781	0	1	67	1	1	0	0	3	1	3	3	41.2	136	205	61	85	26	1.3	11.7	69	23	183.248	84.17	0.79	47	30.8	8.091	2.82075	1.74854	2.16327	193.396	-0.564271	1	1	46.5	10.9867
449	2.80548	0	1	51	1	1	0	0	2	1	2	2	41.1	126	194	93	75	20	1.2	12.9	15	12	139.563	62.906	1.12	36.5	33.6	7.69728	2.74839	1.90179	3.52273	125.161	-0.985277	1	2	48.85	14.7842
450	2.93973	0	1	54	1	1	0	0	3	1	3	2	25	110	141	47	48	18	0.9	15.3	110	12	185.955	91.258	0.59	45.9	27.4	8.20382	14.3654	6.61062	0.896552	271.154	-1.11394	2	3	27.6	4.38596
451	3.02192	0	1	74	1	1	0	0	3	2	3	2	41.4	142	137	76	62	34	1.3	19.3	15	27	175.13	79.74	0.95	49	31.4	8.21887	2.38372	1.78261	3.37255	79.6512	-0.502675	1	2	50	12.3214
452	3.28219	0	1	53	1	1	0	0	3	1	3	2	41.1	150	198	67	51	16	1.5	15.6	12	8	146.135	66.45	0.9	45.4	28	7.73654	1.96875	1.38971	4	103.125	-0.884607	1	2	50.7	14.8375
453	3.30959	0	1	47	1	1	0	1	3	1	3	2	37.4	138	164	63	93	12	1.3	11.6	13	11	107.475	88.6	0.79	44	28.7	8.87858	2.10945	1.59398	3.94118	81.592	-0.801632	2	3	47.45	9.01205
454	3.36712	0	2	75	0	0	1	0	3	2	3	1	39.7	123	185	54	41	23	1.2	17.7	17	12	165.851	85.056	0.82	49.5	34.5	8.26585	27.6667	6.91667	0.48	770.833	-0.116506	2	4	40.9	10.4749
455	3.36712	0	1	56	1	1	0	0	3	2	3	1	45.7	137	113	54	89	29	1.5	15.2	19	12	154.64	73.538	0.85	47.3	29.9	7.81144	2.58824	1.80822	3.77778	110.784	-0.385351	1	2	50.8	21.9712
456	3.53151	0	1	59	1	1	0	0	2	2	3	2	41.1	133	191	87	77	17	1.3	22	22	10	187.888	254.282	1.07	43	31.8	9.18962	1.60784	1.14953	4.78125	124.837	-0.537119	0	0	48.75	13.5197
457	3.67123	0	1	61	1	0	0	0	2	2	3	2	40	107	255	69	122	34	1	9.8	26	19	194.846	73.538	0.8	49.8	39.2	8.05106	2.73034	1.91339	4.2381	286.517	-0.477121	1	1	44.45	10.8992
458	3.68493	0	1	68	1	1	0	0	2	1	2	2	39.4	144	180	109	95	30	1.3	23	22	33	150.774	79.74	1.27	40.1	29.3	8.08229	3.69298	2.8255	4.07143	157.895	-1.77085	2	4	45.1	12.429
459	3.70959	0	2	54	0	0	1	0	3	1	3	2	40.1	120	133	67	104	14	1.4	12.5	27	14	179.382	171.884	0.93	46.5	28.3	8.90219	2.30159	1.70588	4.34483	105.556	0	1	2	46.4	10.3886
460	3.7863	0	1	68	1	0	0	0	3	2	3	2	35.9	125	256	67	93	15	1.2	15.7	19	14	159.666	165.682	1.04	54	30.2	8.82462	1.70149	1.32558	3.94118	127.363	-1.11394	2	3	45.95	12.8214
461	4.01644	0	1	70	1	1	0	0	4	1	3	2	43	152	166	113	55	26	1.6	15.2	13	22	194.073	69.994	1.26	44.7	27.3	8.04905	3.32203	2.08511	2.36	140.678	-0.69897	1	2	48.9	14.527
462	4.11507	0	2	73	0	0	0	0	3	1	3	2	39.6	129	227	53	89	26	1.3	23.9	19	18	245.878	79.74	0.93	45.5	30.9	8.09332	1.42077	1	4.94595	124.044	-0.221849	1	1	48.75	8.66521
463	4.13151	0	2	62	0	0	0	0	3	0	3	1	41.6	147	170	79	79	22	1.3	17.5	12	20	182.475	62.906	1	46	32	7.91164	0.980769	0.796875	5.33333	81.7308	-1.23045	0	0	52	13.9597
464	4.16986	0	1	46	1	1	0	0	1	0	1	2	43.9	163	239	58	61	43	1.4	14.7	69	56	211.47	146.19	0.77	49	31.7	8.72756	1.15417	0.978799	6.66667	99.5833	-1.17609	0	0	55.9	9.01437
465	4.27123	0	1	42	1	1	0	0	3	0	2	2	46.9	158	266	60	82	23	1.5	17	48	25	165.851	102.776	0.74	42.5	30.8	8.12176	2.00526	1.23301	2.13483	140	-1.43136	1	2	56.4	11.1401
466	4.40548	0	1	67	0	1	1	0	3	3	3	2	39.9	133	303	68	63	18	1.2	7.1	31	18	124.099	55.818	0.77	41.3	32.2	7.80036	7.60784	4.73171	1.85455	297.059	0.367977	2	4	45	7.0123
467	4.43562	0	1	80	0	1	0	0	2	0	2	2	36	127	254	84	60	20	1.4	13.8	29	16	176.29	164.796	1.17	41.3	25.8	8.90132	2.46497	1.8169	4.61765	161.783	-1.04139	1	2	43.85	11.0769
468	4.44384	0	1	69	1	1	0	0	1	0	1	2	35	127	83	51	45	23	1.4	12.4	41	28	212.243	93.03	1	52.5	24.5	7.93312	1.0076	0.746479	3.92537	31.5589	-1.17609	2	2	48.15	9.45946
469	4.45479	0	1	65	1	1	0	0	3	0	1	2	42	119	166	71	78	17	1.8	8.1	12	14	151.934	76.196	0.94	46	23.2	8.20201	3.85714	2.30855	1.78889	103.106	-1.49136	1	3	50.05	14.3836
470	4.46027	0	1	62	1	1	0	0	3	0	2	2	48.4	154	199	97	95	53	1.6	23.5	113	77	197.939	90.372	0.97	40.6	29.7	8.0774	1.98864	1.45833	3.2	113.068	-1.27875	1	1	57.2	17.1631
471	4.53425	0	1	65	1	0	0	0	3	0	2	2	39.2	146	190	93	89	22	1.4	17.9	16	20	178.996	129.356	0.92	43.7	28.9	8.35726	1.74237	1.36702	5.17544	64.4068	-1.17609	1	2	53.95	10.8287
472	4.55342	0	1	52	1	1	0	0	3	0	2	2	42.9	148	196	66	49	19	1.4	31.9	13	18	156.186	168.34	0.89	48.9	31	8.74149	1.61644	1.23776	6.25714	89.4977	-1.27875	0	1	53.85	11.5013
473	4.6137	0	1	60	1	1	0	0	2	2	3	2	45	152	171	89	96	17	1.6	19.4	17	13	190.594	55.818	0.88	43.5	28.5	7.79209	2.65649	1.91209	3.9697	130.534	-0.646264	1	1	51.55	12.0643
474	4.76438	0	1	60	0	0	0	0	4	0	1	2	40.2	129	143	74	88	29	1.5	10.4	16	22	161.985	72.652	1	40.7	27.2	7.80998	2.82653	1.69939	1.84906	145.918	-1.32222	1	2	45.1	11.4857
475	4.78082	0	2	67	0	0	0	0	3	0	2	1	37.9	107	215	48	59	17	1.4	18.1	15	9	226.934	54.046	0.76	50.4	27.4	7.64335	1.50292	1.15247	5.18182	125.731	-1.32222	1	1	46.45	11.0174
476	4.80274	0	1	65	0	0	0	0	1	0	1	2	42.5	122	83	88	90	29	1.3	9.6	23	23	143.815	130.242	1.29	56.5	33.4	8.72294	2.88961	2.06977	3.42222	53.8961	-1.23045	1	2	50.2	8.74486
477	5.01918	0	1	47	0	0	0	0	3	0	2	2	43.7	136	280	63	76	54	1.3	18.8	15	11	223.841	87.714	0.71	44.1	32.4	8.38149	4.27731	2.66492	2.16364	235.294	-1.36173	1	2	49.65	9.18067
478	5.39452	0	2	69	0	0	0	0	2	1	3	3	40.1	131	138	63	96	22	1.4	14.9	14	12	156.186	45.186	0.88	45.1	28.5	7.5577	1.84896	1.44898	4.92308	71.875	-0.367977	0	1	49.7	10.0501
479	5.47945	0	2	54	0	0	0	0	3	0	2	2	31.2	115	188	35	133	35	1	15.7	23	59	245.878	124.04	0.53	41.5	31.2	8.47644	10.0333	5.10169	1.01124	208.889	-1.54407	2	3	35.7	7.13959
480	5.70411	0	1	58	1	1	0	0	3	1	3	2	38.7	136	127	76	70	18	1.5	13.5	24	10	146.521	93.916	0.97	43.6	25.5	8.13834	2.10502	1.65233	4.97727	57.9909	-1.01424	1	2	49.65	10.4878
481	5.81918	0	1	60	1	1	0	0	3	3	4	1	40.2	140	226	85	91	24	1.2	14.4	22	25	173.583	152.392	0.94	43.9	32.4	8.76055	1.59113	1.12544	3.38333	111.33	-0.185637	1	2	50.35	11.3239
482	5.87671	0	1	68	1	1	0	0	2	0	2	1	36.1	118	186	56	152	31	1.2	15.1	60	35	124.872	120.496	0.79	54.6	31.1	8.82621	0.891566	0.698113	4.44643	74.6988	-1.36173	1	2	48.55	15.6277
483	5.89589	0	1	55	1	0	0	0	3	1	3	2	40.6	143	329	58	112	23	1.6	17.8	80	26	209.151	114.294	0.75	41.9	26.1	8.4289	1.89091	1.25806	3.23529	199.394	-0.636822	1	1	48.85	11.6332
484	5.96986	0	1	66	1	0	0	0	2	0	2	3	40.5	152	80	90	121	39	1.3	23.1	28	46	201.805	108.978	0.98	46.8	31.7	8.53124	1.97861	1.42308	2.87692	42.7807	-1.39794	1	1	49.85	11.3445
485	6.00548	0	1	63	1	1	0	0	2	0	2	3	37.5	149	80	85	49	17	1.9	16.9	13	13	132.604	54.046	0.99	41	19.9	7.57335	1.72093	1.18085	3.79412	62.0155	-1.39794	2	3	43.95	17.4419
486	6.02466	0	2	61	0	0	0	0	2	0	1	2	41.9	132	185	77	82	25	1.2	20.6	19	29	180.929	87.714	0.93	42.2	35.4	8.36692	1.79654	1.31746	3.66667	80.0866	-1.5682	1	1	53.45	8.65702
487	6.03014	0	1	66	1	0	0	0	1	0	1	1	40.2	125	193	83	53	24	1.5	17.9	13	22	178.223	46.958	0.9	46.5	26.2	7.57471	0.955414	0.681818	5.81481	122.93	-1.61278	0	1	48.05	13.1803
488	6.03288	0	1	61	1	1	0	0	2	0	1	1	38.7	135	100	75	64	31	1.5	27	12	43	192.913	110.75	0.9	41.8	25.4	8.44993	2.20536	1.72727	5.09091	44.6429	-1.43136	1	1	49.9	12.9
489	6.23562	0	1	67	0	0	0	0	2	1	2	2	39.6	148	202	71	77	22	1.5	12.8	16	18	207.218	97.46	1	44.1	26	8.41177	2.5098	1.62712	2.31818	132.026	-0.477121	2	2	47.25	12.899
490	6.23836	0	1	58	1	1	0	0	3	0	2	3	38	138	249	79	65	20	1.4	9.3	15	15	118.686	84.17	1.07	46.6	27.9	8.1861	3.21875	2.31461	2.97674	194.531	-1.04139	2	4	44.4	7.78689
491	6.27671	0	1	64	1	1	0	0	2	0	2	3	44.3	152	142	71	76	26	1.5	17.2	37	47	284.151	92.144	0.76	45.1	29.8	8.28711	4.95349	3.73684	3.44	165.116	-1.27875	1	2	48.6	14.9158
492	6.30411	0	1	62	1	1	0	0	3	0	2	2	48.4	153	285	95	92	24	1.6	11.5	42	25	127.965	100.118	1.06	43.4	30.3	8.62973	3.08122	2.39921	4.69048	144.67	-1.4624	0	2	58.25	12.8382
493	6.43836	0	1	62	1	1	0	0	2	0	2	2	40.5	143	145	104	162	19	1.4	12.3	25	18	153.48	89.486	1.09	41.5	28.8	8.21301	1.54585	1.12025	4.87234	63.3188	-1.49136	0	1	51.95	15.1119
494	6.64384	0	2	48	0	0	0	0	2	0	2	2	38.6	122	178	55	57	17	1.4	11.2	8	8	150.387	46.958	0.65	45	27.6	7.36556	2.13861	1.27811	3.60714	88.1188	-1.23045	2	3	48.7	7.94239
495	6.64932	0	1	67	1	1	1	0	2	0	2	1	41.7	134	113	81	102	59	1.3	10.3	137	40	155.027	142.646	1.18	54.7	32	8.89806	2.6646	1.94118	3.83333	70.1863	-1.54407	1	2	49.75	10
496	6.64932	0	1	65	1	0	0	0	3	0	2	1	43.7	138	226	70	88	45	1.5	16.2	32	44	184.408	64.678	0.86	44.2	29.5	7.7825	4.32292	2.37143	2.18182	235.417	-0.69897	1	2	48.5	10.2103
497	6.67671	0	1	45	1	1	0	0	3	1	3	3	40.4	139	247	60	40	16	1.6	24	18	14	109.408	98.346	0.74	42.5	25.4	8.32901	1.27315	1	4.8	114.352	-1.13566	0	1	51.2	17.1915
498	6.67945	0	1	57	1	0	0	0	3	0	2	2	40.9	135	127	63	62	22	1.5	21.3	14	32	197.166	49.616	0.83	52.5	27.9	7.72882	3.13913	2.13609	2.21154	110.435	-1.32222	1	2	46.65	12.943
499	6.7589	0	1	61	1	1	0	0	3	1	3	2	41.2	104	350	83	72	26	1.5	14	22	9	136.856	65.564	1.08	34.6	28.4	8.02506	2.33728	1.61224	3.07273	207.101	-0.221849	1	2	49.65	9.62617
500	6.76164	0	1	58	1	1	0	0	1	0	1	1	43.1	137	111	70	91	25	1.6	16.6	15	16	144.202	93.03	0.78	48.9	27.4	8.45113	1.79574	1.37013	3.98305	47.234	-0.477121	1	2	54.85	14.3189
501	6.78356	0	1	47	1	0	0	0	1	0	1	2	44.8	159	169	75	74	11	1.6	27.1	20	22	245.878	118.724	0.79	41.1	27.8	8.43031	2.01026	1.58065	5	86.6667	-1.23045	0	0	54.55	14.9333
502	6.78356	0	2	54	1	1	0	0	1	0	1	2	39.3	114	152	63	92	18	1.4	14.7	11	13	171.264	80.626	0.76	42.6	27.3	8.00774	1.20904	0.699346	3.10526	85.8757	-1.27875	2	3	48.15	12.8431
503	6.84384	0	1	48	1	1	0	0	3	2	3	1	44.3	138	209	95	121	29	1.4	15.8	37	49	149.228	130.242	0.76	41.2	32.6	8.58394	2.36957	1.84746	3.83333	90.8696	-0.407485	1	2	55.8	9.84444
504	7.33973	0	1	64	0	0	0	0	1	0	1	2	38.3	143	155	79	96	15	1.3	13.6	14	12	145.362	113.408	1.02	46.1	29.9	8.44773	1.6	1.06897	3.97436	100	-1.11394	2	3	46.05	9.31873
505	7.40822	0	1	64	0	0	0	0	3	1	3	1	39.3	148	205	124	117	29	1.3	20	19	32	236.599	209.096	2.13	53.4	29.7	8.77549	1.08627	0.670702	3.64286	80.3922	-0.985277	2	2	52.05	11.9453
506	7.50685	0	2	71	0	0	1	0	3	1	3	2	45.7	137	206	66	57	16	2	12.9	17	8	180.929	101.89	1.13	42.5	23.2	8.46785	1.70813	1.35741	5.225	98.5646	-0.531479	0	0	56.15	11.8394
507	7.56712	0	2	66	0	0	1	0	2	1	3	2	44.3	116	152	68	71	15	1.5	15.4	12	6	168.558	45.186	0.97	48	28.6	7.6907	1.73973	1.44318	4.86667	104.11	-0.636822	0	1	51.6	15.7092
508	7.6411	0	1	69	1	1	0	0	2	0	2	2	39.9	104	149	90	74	28	1.6	6.3	9	16	149.614	63.792	1.16	50.5	25.7	8.04479	5.23077	3.72603	2.6	143.269	-1.23045	2	4	45.1	10.2571
509	7.65479	0	1	58	0	0	0	0	1	0	1	2	46.7	119	159	67	67	20	2	18.1	15	13	166.625	76.196	0.68	51.6	23.6	8.12384	4.44	2.52273	2.5	159	-1.11394	1	3	51.7	17.6894
510	7.70411	0	1	48	1	0	0	0	3	1	3	2	41.1	155	211	104	69	21	1.5	18.1	14	11	145.362	82.398	1.03	39.1	27.3	8.13701	1.42718	1.06522	4.12	102.427	-0.869232	1	2	51.4	8.78205
511	7.73151	0	1	81	1	1	0	0	3	1	3	2	44.8	136	285	70	75	25	1.3	11.3	45	23	161.212	67.336	0.3	38.3	35.5	8.22662	3.42647	2.53261	4.53333	209.559	-0.792392	0	2	51.6	9.82456
512	7.73425	0	1	63	1	1	0	0	3	0	2	3	34.8	106	306	53	73	16	1	3.7	14	6	139.563	77.968	0.62	48.1	34.5	8.07304	4.79333	2.9834	2.14286	204	-1.59106	2	4	42.3	6.66667
513	7.73973	0	2	58	0	0	0	0	3	0	2	1	40.7	111	118	50	105	20	1.3	12.8	24	15	197.553	84.17	0.36	39	30.5	8.30529	3.10833	2.10734	2.4	98.3333	-1.49136	1	2	46.7	9.83092
514	7.7726	0	1	74	0	1	0	0	3	0	2	1	34.9	118	225	80	76	15	1.3	6.9	15	11	200.645	47.844	0.58	43.6	26.8	7.52379	3.16794	1.93023	2.18333	171.756	-1.17609	2	3	41.45	6.48699
515	7.77534	0	2	55	0	0	0	0	1	0	1	1	40.2	104	81	38	460	62	1.4	9.7	528	57	162.759	55.818	0.44	41.3	28.9	7.82073	2.73563	2.125	8.7	93.1034	-1.27875	0	1	44.55	11.686
516	7.77808	0	2	52	0	0	0	0	2	0	2	2	41.5	136	170	66	80	21	1.3	29.2	9	20	179.769	79.74	0.47	40.8	31.1	8.20524	1.64327	0.722365	5.7	99.4152	-1.32222	0	1	50.05	12.5758
517	7.81096	0	1	49	1	1	0	0	3	2	3	2	38.4	137	210	88	67	24	1.1	10.1	54	32	192.913	115.18	0.63	41.9	34.9	8.60385	3.14881	2.10757	2.4	125	0.367977	2	3	46.8	5.59767
518	7.81918	0	2	63	0	0	1	0	1	0	1	1	41.8	124	128	55	66	21	1.5	20.6	22	9	198.712	95.688	0.58	41.2	28.5	8.33109	1.84615	1.5	4.76667	89.5105	-1.32222	0	0	48.95	12.9814
519	7.95342	0	2	54	0	0	0	0	3	0	2	2	39	115	237	66	68	22	1.3	13.1	14	9	138.016	80.626	0.71	43.4	28.9	8.15566	3.37405	2.35106	3.275	180.916	-1.04139	2	4	45.55	10.1036
520	8.05753	0	1	53	1	1	0	0	1	0	1	1	46.9	138	172	69	37	30	1.7	27.4	43	19	210.31	169.226	0.75	46.2	27.1	8.82808	2.25781	1.69006	4.26667	134.375	-1.81291	1	1	53.3	10.2402
521	8.12055	0	1	62	0	0	0	0	1	0	1	1	41.1	141	185	102	56	21	1.1	21.7	14	16	213.017	65.564	1.02	45.1	38.2	7.96949	2.90083	1.60274	3.025	152.893	-1.17609	1	1	47.15	14.8913
522	8.13425	0	1	65	0	0	0	0	1	0	1	3	44.4	140	151	70	80	27	1.56	31	18	30	183.635	71.766	0.84	42.4	28.4	7.74879	1.375	1.09424	5.06667	49.6711	-1.43136	0	0	59.6	15.8007
523	8.15342	0	1	67	1	1	1	0	2	0	2	2	45.3	149	204	75	18	14	1.6	18.9	14	10	164.305	70.88	0.87	43.3	28.4	8.06565	2.2783	1.68293	5.3	96.2264	-1.27875	0	1	55.9	13.2456
524	8.1589	0	2	70	0	0	0	0	3	0	2	1	43	120	128	92	81	21	1.3	7.4	24	23	117.913	116.952	1.49	44.4	34.2	8.41993	3.26891	2.14917	3.96667	107.563	-1.23045	1	3	48.95	9.20771
525	8.22192	0	1	60	0	0	0	0	3	0	2	2	45.8	147	217	78	77	27	1.4	23.9	22	25	161.599	79.74	0.82	46.3	33.6	8.18543	3.0411	2.6747	7.3	148.63	-1.54407	0	2	53.1	13.921
526	8.27123	0	2	48	0	0	0	0	1	1	2	2	47.6	108	65	73	61	46	1.4	12	13	36	194.846	120.496	0.92	51	35.1	8.53853	1.92517	1.30415	4.9	44.2177	-0.477121	0	0	54.95	11.9
527	8.33699	0	1	62	1	1	0	0	1	0	1	2	42.1	135	71	90	57	22	1.7	8.8	14	30	134.923	63.792	0.93	42.9	25.1	7.87891	1.15421	0.939163	7.13333	33.1776	-1.51851	0	1	52.8	16.5098
528	8.49041	0	1	56	1	1	0	0	3	0	2	3	49.1	156	218	73	106	23	2.4	20.1	84	22	173.583	52.274	0.82	43.4	20.6	7.63077	2.05	1.5	4	181.667	-1.51851	1	2	55.1	13.831
529	8.53973	0	1	62	1	1	0	0	1	0	1	1	39.1	134	218	70	68	20	1.4	19.6	16	20	176.29	48.73	0.82	46.1	27.1	7.71276	1.71034	1.22772	4.83333	150.345	-1.49136	1	2	46.35	11.8485
530	8.5589	0	1	44	1	1	0	0	3	0	2	2	37.7	132	238	84	74	16	1.4	9.6	26	14	160.052	106.32	0.79	40.9	27.4	9.11497	4.63542	2.87097	1.92	247.917	-1.43136	2	4	42.5	8.24945
531	8.62192	0	1	70	1	1	1	0	2	0	1	1	36.8	129	124	57	66	26	1.2	12.3	19	20	141.109	40.756	0.91	42.2	30.2	7.43088	2.42384	1.63393	3.02	82.1192	-1.51851	2	3	44.35	7.27273
532	8.62466	0	1	63	1	1	0	0	1	0	1	1	44	122	162	71	62	17	1.9	20.3	12	9	152.32	61.134	0.86	46.4	22.7	7.83635	1.44286	0.971154	7	115.714	-1.49136	0	1	51	15.942
533	8.62466	0	1	65	1	1	0	0	2	0	2	2	43.1	154	140	72	93	22	2	16.2	31	20	219.202	108.978	0.93	49.7	22	8.36998	2.0452	1.52101	3.54	79.096	-1.11394	1	1	51.95	17.6639
